# Supplementary material
Source: publisher site journal article supplement (https://www.spandidos-publications.com/4814/downloadSupplementary)
Supplement: Supplementary file 2 [file downloadSupplementary]

## Sheet: Table SI
Table SI. Association between the expression of FRGs and the clinical status of two clusters of patients with breast cancer.
sample	Time	Status	risk	ACACA	ACO1	PLIN2	ALB	ALDH3A2	ALOX12	ALOX5	ALOX12B	ALOX15	ALOX15B	ARNTL	ASNS	ATF3	BNIP3	CA9	CAPG	CAV1	CBS	CD44	CDKN1A	CDKN2A	CDO1	CFTR	CP	CRYAB	CYBB	DBN1	AKR1C1	NQO1	DPP4	DRD4	TSC22D3	DUSP1	EPAS1	ACSL1	ACSL4	FDFT1	FH	FLT3	MTOR	G6PD	GCH1	GCLM	GPX2	CXCL2	HELLS
GSM519117	7	0	cluster 1	9.10761	6.06166	8.1538	4.42202	8.66563	5.84789	8.18557	2.93649	2.91938	5.10148	8.51039	6.89316	7.29413	9.28827	6.80662	10.7002	9.97079	5.64174	9.18725	9.92243	6.82776	6.905	3.55564	6.82251	8.68463	5.99259	8.94471	6.18772	12.3318	6.61013	3.1475	8.68328	8.86212	9.44682	11.2194	8.28262	10.7937	10.4907	7.55201	7.86763	10.0531	10.5228	9.61206	5.97884	6.52302	8.03607
GSM519118	7.4	0	cluster 1	7.25562	8.07066	9.40807	4.12729	10.0699	5.94082	7.54039	3.72377	5.18364	9.2966	7.9651	6.07833	7.55058	10.1527	7.46202	9.47912	11.6897	6.57679	9.20901	9.99958	6.9968	7.90857	3.45061	6.53017	12.8091	5.21375	8.87046	7.05899	9.31114	5.31325	3.02526	8.79816	9.35931	10.1643	11.3707	8.2222	11.2613	9.97542	7.03265	7.27879	7.10382	9.6779	9.05377	6.60021	6.48987	7.17593
GSM519119	7.2	0	cluster 1	8.8895	8.07181	8.41414	5.14156	9.94435	5.62659	8.08736	3.852	3.29469	6.93346	9.48212	6.84314	8.76164	9.51632	6.42658	10.9966	11.2425	6.43136	8.98878	10.6893	7.45748	7.23663	3.75196	6.93781	10.4258	5.85209	9.206	6.97545	9.74596	6.33438	3.34385	8.33179	8.63409	9.32619	10.7048	8.69098	10.7804	9.82579	7.99361	7.74963	9.14913	10.3873	10.0943	4.85963	5.42374	7.13624
GSM519120	6.3	0	cluster 2	9.09487	7.38454	9.11153	6.31362	9.46813	5.97117	8.08735	2.53382	6.71202	5.42051	8.80717	6.10672	7.51844	10.3278	8.11157	11.3012	10.1279	6.5316	9.5115	9.52457	6.8452	6.76806	3.83907	7.29652	9.25393	6.9236	9.464	6.70079	10.6174	7.58619	2.39877	8.15626	8.19996	9.29237	9.35385	7.89113	10.0459	9.93573	8.34609	7.66236	9.46431	10.473	9.63071	6.36544	5.79598	8.18214
GSM519121	7	0	cluster 2	9.38317	6.95542	9.82006	4.25184	9.49257	3.80787	8.71662	5.70917	5.44572	8.27753	7.9915	8.18627	9.29817	9.61689	7.10407	11.8132	10.144	8.31915	8.91523	9.72628	10.3002	7.18723	3.51162	9.35329	11.151	6.40139	9.67191	7.05585	10.4736	6.12039	2.37377	7.30862	9.24177	9.25341	11.4485	8.4357	10.882	11.164	6.68386	7.32967	8.88173	10.3325	10.2332	5.91528	6.30593	7.38314
GSM519122	7.3	0	cluster 2	9.59177	7.25441	8.48134	4.37973	8.74526	6.50652	7.70342	3.30836	8.29402	13.8439	8.84397	7.60561	8.95711	11.004	7.16935	11.6258	9.87706	5.55513	9.7319	9.16164	5.82593	6.43033	3.84838	5.70855	12.3367	6.88235	9.50359	6.86598	9.92163	6.13139	1.73482	9.5207	9.47277	8.94615	12.3905	7.92703	10.3335	10.1771	6.94804	7.06983	9.5802	10.6159	8.10549	5.86335	5.97355	7.889
GSM519123	6.8	0	cluster 1	9.14409	7.75058	8.46439	4.57317	10.6834	6.2821	8.762	4.00277	5.38584	7.86297	8.2811	7.15157	8.9384	10.2019	6.6679	11.1438	11.1002	6.91823	9.65437	10.8156	6.55721	7.45065	4.17623	10.0409	10.1664	6.27405	8.44837	6.30665	10.5103	5.76913	4.59468	8.54223	9.54547	9.71954	9.7988	8.74724	10.8023	9.86686	6.06957	7.73722	9.03194	9.43386	9.3467	4.28407	7.08759	7.47034
GSM519124	7.1	0	cluster 2	8.43923	8.1722	9.60262	5.08981	9.69249	6.32771	8.42426	2.553	2.39877	6.88702	8.46663	6.26781	8.15339	9.87802	6.88058	11.7871	10.183	6.62703	9.62331	10.1709	9.58208	8.52476	3.32205	10.3402	10.9765	8.09342	9.28906	7.26146	9.28196	5.46807	3.94049	7.68191	9.58388	10.6761	11.01	9.03359	10.8437	10.4107	6.80218	7.0394	8.86589	12.3027	9.86677	5.72569	7.95608	8.49987
GSM519125	6.5	0	cluster 2	8.88234	7.93231	7.85418	4.20425	9.61706	7.80197	8.56661	8.30143	2.70992	5.66336	8.92941	6.92586	9.16311	10.1915	6.78076	11.2944	11.5518	6.40979	10.3496	11.1831	6.5232	7.30122	4.51108	7.47416	10.944	7.2954	9.17812	9.22312	8.54325	7.6109	2.39308	8.51043	9.93678	9.97736	10.7838	9.02714	10.6237	9.74567	5.89728	6.25288	9.5216	11.1152	9.75007	6.3322	6.91078	6.45119
GSM519126	5.4	1	cluster 2	8.28513	7.92917	8.50397	5.85663	8.53038	5.6661	8.19114	2.74024	2.11446	4.45652	8.35142	6.89245	9.5199	9.21755	6.56451	11.0865	10.1608	7.55142	8.65484	9.49205	6.82779	7.50033	3.02719	9.87113	11.0456	6.35969	9.59183	5.97827	8.0253	7.13615	2.1743	8.36542	9.9947	9.57561	10.7307	8.58244	10.9956	10.5027	6.98454	7.37412	8.32171	10.1868	9.09826	5.07802	5.78406	7.57448
GSM519127	7.1	0	cluster 2	8.71726	7.84021	7.54404	4.77764	9.66521	6.46798	8.57731	3.64614	2.50881	7.14516	8.07719	6.97933	8.65328	9.51524	7.55246	11.0531	10.4753	6.95657	9.02709	10.6508	7.58986	6.85159	3.18808	6.87789	9.99544	6.1519	9.65619	6.88851	11.3601	7.15436	2.90616	8.77261	10.198	9.62074	11.3986	8.5178	10.6227	10.5534	7.03135	5.71572	10.4271	11.4592	9.98559	6.79067	6.28571	7.31126
GSM519128	6.9	0	cluster 1	8.77308	7.99971	8.47416	3.97644	8.94881	5.71862	7.69043	3.3362	3.2528	8.14817	8.56974	6.48867	9.07047	9.68098	7.1033	10.7178	10.8812	6.71056	9.61438	10.3058	8.2352	7.19894	3.25334	7.1654	10.7803	7.20665	9.56613	6.25863	9.79777	7.12734	2.49967	7.40658	9.80785	10.0543	9.95839	8.43041	10.4071	10.423	7.68784	7.49879	8.8545	10.031	9.59821	5.40912	6.87759	7.78716
GSM519129	7	0	cluster 2	9.1183	8.23161	9.3991	4.23815	10.1462	5.96589	7.76333	3.5336	6.09063	6.29681	8.94894	7.91552	8.28019	9.86493	6.89379	10.2298	10.5118	9.47909	9.7149	9.74192	8.06009	5.53448	3.61159	8.82965	13.448	7.12391	9.58171	7.76715	11.6342	4.46945	3.1264	7.45004	8.76901	9.53325	11.4915	7.8437	10.1357	10.4687	5.69095	7.78847	8.41828	10.9267	10.4961	6.54017	5.08622	6.87261
GSM519130	6.4	0	cluster 2	8.26752	7.45508	10.2893	3.58451	8.93504	7.70545	8.34681	2.74651	1.67495	4.89682	8.10642	8.44554	8.95142	9.80534	8.13273	11.8605	9.95255	10.0477	9.30068	10.0533	10.1539	5.87307	3.91438	9.8587	11.017	7.6403	9.5391	5.98983	8.74192	6.77252	4.44066	7.90091	8.64475	8.34306	10.8496	9.25261	10.6308	11.1125	6.97892	7.35607	8.87795	11.3739	10.056	4.24508	7.27378	8.65166
GSM519131	7	0	cluster 1	8.68332	8.34065	8.49531	4.26055	10.2068	6.00007	8.97363	3.99531	6.03456	7.25229	9.22815	5.66705	9.98514	9.80492	7.29765	12.2799	11.1564	7.23139	9.96756	10.8108	6.69672	8.19241	3.76754	8.73373	10.4858	7.543	9.65339	5.83815	10.2354	7.16439	3.35406	8.91483	10.564	9.86726	10.2648	8.61555	11.3093	10.3395	8.01237	5.90596	9.30706	9.88602	9.54353	3.86525	6.741	8.30915
GSM519132	8	0	cluster 1	8.97299	8.02349	8.12238	4.32371	9.93871	5.02074	7.61372	3.16783	2.91643	7.20166	8.34776	6.4237	10.2053	10.0421	6.50313	10.8852	11.1347	6.78811	9.13638	9.78204	6.61095	7.30954	3.50485	5.69439	9.54826	6.45736	9.28439	7.17997	10.582	8.29691	3.20103	8.59747	10.6074	10.4163	10.8699	8.63632	11.0878	10.4942	8.20105	7.11009	8.35739	10.0573	8.77758	5.02514	6.78012	6.77568
GSM519133	1.8	1	cluster 2	8.52264	7.22219	8.80261	4.93377	9.35165	3.5811	8.07751	3.20885	3.82967	5.38463	8.15638	5.49363	7.97048	9.82907	5.61302	10.6629	10.7244	6.38814	9.93052	9.88972	7.05518	9.69731	3.27049	11.5073	9.3681	6.43299	9.33768	7.88745	10.9503	5.66694	3.46003	8.47009	9.53067	10.4732	13.0164	7.95561	10.4046	12.5541	6.47003	7.18495	11.1484	10.8935	9.19763	5.26209	5.62602	6.31102
GSM519134	6.1	0	cluster 2	7.68037	7.58494	8.58574	4.22088	8.83393	6.57281	7.07193	5.03649	5.57151	5.33569	8.68409	5.45138	8.1737	11.4612	7.50363	10.6875	9.85303	6.51197	9.80265	9.99524	7.94328	7.13951	3.20263	6.33069	8.52173	5.45523	9.67487	6.21393	11.0856	6.33081	2.30134	8.72932	9.39067	9.342	10.4343	7.7649	10.6048	10.2704	8.76216	5.73816	9.8862	11.103	9.56178	5.28137	5.44436	8.21386
GSM519135	3.5	1	cluster 2	9.10292	8.0668	9.55006	1.75798	8.67432	5.82794	8.18958	2.82702	3.64244	4.39262	8.66557	6.60034	8.54863	10.4957	7.63151	11.2215	10.8454	6.85949	9.09543	11.4329	6.86815	6.56298	4.57727	10.6408	10.152	6.39621	10.3957	7.52956	11.5091	7.13274	4.29258	7.6047	9.40326	9.93261	10.8198	8.7805	10.7919	9.90596	6.41336	5.75072	10.3616	10.2413	9.46246	6.26097	6.48829	7.91533
GSM519136	7	0	cluster 2	8.34372	7.1888	7.97502	6.43052	9.03721	5.48184	8.22092	2.87335	2.37292	6.22614	8.8289	8.69433	8.59334	9.65697	7.25976	11.7764	10.0132	7.08512	9.09406	10.3231	7.47972	6.81304	4.62597	6.02855	9.66722	5.93078	9.4057	6.67543	11.288	5.66307	1.98443	9.1863	10.1573	9.84393	9.57155	8.18151	10.8873	10.211	7.87243	6.55727	9.91731	10.5372	9.78699	7.07644	5.83289	7.56225
GSM519137	7.2	0	cluster 2	9.24896	7.57126	10.4223	4.06655	10.7431	5.76831	8.6171	3.73809	4.45179	4.81217	9.02909	7.39009	9.68322	12.5444	8.38209	11.8115	10.2567	5.51769	10.2934	9.42994	5.7272	6.37067	2.76014	10.3575	9.52589	7.68893	9.58214	7.18975	10.8769	6.08141	2.10689	8.04169	10.0149	9.67449	10.8267	10.735	10.2262	10.0079	6.14999	6.94883	9.62995	11.3316	11.0025	4.68893	6.07884	8.29854
GSM519138	5.2	1	cluster 2	8.54355	7.80559	8.54732	4.41119	9.65385	5.91902	7.78113	6.09212	6.47026	6.61206	9.19355	6.0784	9.24988	10.4565	8.00917	11.718	10.6672	7.78098	9.24643	11.6058	7.55571	7.39698	3.87918	6.16319	9.40128	5.72774	10.1986	7.45118	9.52324	5.80405	2.83445	8.65784	11.1384	10.2565	10.5444	7.87299	11.5024	10.0991	7.84809	6.43025	9.00476	10.649	9.98946	5.63843	6.1859	7.86824
GSM519139	7.1	0	cluster 1	9.17813	8.38567	8.61804	5.2816	9.4735	6.35234	7.6444	3.64893	3.21665	4.78925	8.82843	6.8784	8.05163	8.83839	7.26032	11.3347	9.95514	6.70553	10.4485	10.2241	7.31075	9.04982	3.82115	6.33796	8.78444	6.30627	9.72809	6.64068	10.4283	6.78753	1.78739	8.64897	8.86505	8.22816	9.59469	7.63463	11.8441	10.4788	7.87977	7.17123	9.08566	11.3343	9.3079	5.97053	4.85814	8.6401
GSM519140	6.8	0	cluster 1	8.06805	7.24786	8.77999	4.9499	9.57822	4.7488	8.09359	3.78859	4.60015	7.05027	8.71866	6.7532	6.98652	10.2324	6.4505	10.8381	11.0006	7.86115	8.77485	9.61533	7.01458	7.24956	2.51933	5.58823	9.97482	6.60332	9.41271	6.11107	11.1088	7.59866	2.20904	8.23686	9.68126	10.4299	10.1064	7.86504	11.6071	9.83804	8.60806	6.89964	9.65251	10.5794	8.84705	5.66704	4.81979	8.42458
GSM519141	1.9	1	cluster 2	9.46657	7.33043	7.79583	3.68976	9.9749	3.75303	8.0762	5.53596	6.00304	10.5793	8.69296	6.33683	9.53055	10.1286	7.56965	12.2316	9.49382	7.03527	8.985	10.2198	7.56793	7.17771	3.13404	11.5277	9.44001	7.47445	9.60147	7.50961	12.2916	6.80026	1.69625	8.1272	10.0017	10.0571	12.0008	7.8464	11.6519	10.9286	6.06338	7.82914	11.584	10.5712	10.0524	6.10655	6.02264	7.41386
GSM519142	6.9	0	cluster 2	9.04262	7.04098	9.70688	4.4697	9.1272	7.26366	8.06285	1.79316	4.42884	5.15191	8.48675	7.98473	8.9532	9.90305	7.91981	10.81	11.2297	7.35134	9.5262	10.6629	8.93175	7.35362	3.64683	10.162	10.9577	6.26852	9.6038	9.75513	9.83408	6.90966	1.74649	8.25925	10.3018	11.1417	10.7865	8.84578	10.8419	10.3426	6.86544	4.79627	9.59146	9.66035	9.81459	6.10967	7.0209	7.54766
GSM519143	5.4	0	cluster 1	10.0226	7.01637	9.1815	4.22437	11.9674	5.61208	7.66763	2.67294	4.23818	8.8013	9.14537	4.75633	8.3027	9.89494	5.40563	10.775	9.42784	7.80936	8.37985	10.6913	6.35621	7.0015	3.63995	5.24177	8.54611	7.37896	8.94289	6.09076	11.7408	4.12013	3.63806	8.33905	9.57735	9.25296	9.65202	7.11997	12.0061	10.1366	6.49795	6.87211	8.58371	9.51665	8.80285	5.1617	6.2579	8.2212
GSM519144	1.2	1	cluster 2	8.10369	7.92783	9.06162	5.91331	9.48912	5.7811	8.18466	3.80004	2.81874	4.95808	8.30051	9.52606	9.71258	9.39084	6.98695	10.0619	9.83404	10.0095	10.7575	9.20429	9.02565	6.57279	4.3246	5.89447	12.8854	5.91153	10.0154	7.31046	7.03987	7.58683	2.41782	7.8446	9.28139	9.34913	10.7909	8.24533	10.6928	10.501	7.17586	5.96662	8.42419	9.68405	7.44176	6.28055	6.43923	7.07629
GSM519145	5.8	1	cluster 2	8.60943	7.84964	8.41022	5.42245	10.063	4.68192	8.08357	2.90178	3.40437	10.1349	8.23972	6.28014	8.77828	11.4055	7.75785	11.6454	9.7534	6.37571	8.26043	10.4434	6.63756	6.76019	3.24115	7.52833	9.37572	7.09126	9.77721	6.56423	11.1877	7.28488	2.18576	8.4974	9.90847	10.3471	10.8009	7.70652	10.1924	10.0302	8.56947	7.53607	10.4466	10.9792	9.36061	5.75008	6.12846	8.03087
GSM519146	6.9	0	cluster 1	8.72474	8.17722	9.51016	6.94237	11.2979	5.33605	8.97751	5.8183	1.95631	7.9456	7.55952	6.61669	8.01087	10.2103	6.04619	10.5857	11.04	6.72644	9.83728	10.2875	6.64264	7.57759	3.69615	5.74767	10.3244	6.81332	8.64109	5.90371	10.1906	5.87016	2.13787	8.81631	10.2473	10.0581	10.2516	7.23219	11.2671	10.1711	7.19272	6.79896	9.20037	9.86534	10.4134	4.64647	5.70072	7.42471
GSM519147	6.5	0	cluster 1	9.02827	7.77585	8.58335	4.35962	9.23473	2.42002	8.00774	4.94808	5.72911	7.10579	9.10502	6.26402	7.73518	9.28987	7.54598	11.0883	9.67659	5.86136	9.96887	9.58315	6.22014	6.7052	3.3923	5.36071	8.32098	5.98435	9.00764	6.01832	8.96207	5.66485	2.27765	8.81167	9.25479	10.6533	9.15013	7.06135	10.091	11.0074	6.34987	7.35966	9.33893	8.92397	8.73345	6.00348	4.89452	7.44196
GSM519148	6.9	0	cluster 1	9.29034	7.85673	8.69507	4.72645	9.3903	6.46186	8.81407	2.22319	2.43833	4.87075	8.39899	7.27477	8.29587	10.1278	6.24533	10.8741	11.1417	6.38035	8.70979	9.24269	6.71569	6.73509	2.94873	6.16068	9.84205	7.0276	9.14189	7.27548	10.2972	6.19496	2.18254	8.80365	10.0811	10.0245	9.79353	7.59311	11.3045	10.6144	5.89369	6.68699	8.82958	9.16625	9.17246	4.01636	6.32839	7.43687
GSM519149	4	1	cluster 1	7.98292	6.44941	8.94871	4.21263	9.03865	5.35867	7.63331	4.05996	4.9172	5.58033	9.58185	8.32785	9.12193	9.09062	7.01038	11.2919	10.7679	6.89429	8.27895	9.36714	6.67448	7.33381	3.4467	6.15148	9.66722	7.01215	10.2091	5.89955	10.8813	5.88014	2.08448	8.62289	10.1319	9.84973	10.3841	7.59316	10.8761	10.1354	6.86825	6.61769	9.08382	10.4959	8.68571	5.74443	5.64919	8.33491
GSM519150	6.7	0	cluster 1	8.68512	7.51828	8.65128	7.46243	10.2691	5.28122	7.59948	3.09936	5.84893	8.67777	8.55282	6.57955	8.58245	9.91721	6.4767	10.1843	11.8926	5.86072	8.48014	9.96221	6.94355	8.45367	6.12096	8.38346	12.4681	5.52742	8.42228	7.36257	9.92439	6.41939	1.77067	8.63067	10.4745	9.83559	10.4117	8.41555	11.1292	9.70534	6.78002	7.52959	8.1348	9.27161	9.72136	7.29349	7.09277	6.36073
GSM519151	6	0	cluster 2	8.49052	7.85758	9.43254	4.1528	9.8572	8.42155	8.21703	3.6043	6.09463	6.12669	8.29178	8.05743	8.71222	10.5979	7.8753	11.7517	10.898	9.95994	9.02993	9.94467	9.22596	7.24616	4.33507	7.86184	12.7638	7.14901	9.18606	6.32261	7.79663	8.34381	2.2805	7.74073	9.64487	9.85174	10.6675	8.62286	12.3342	10.3196	6.23192	7.46855	9.18398	9.96553	9.95533	5.4606	5.58387	8.438
GSM519152	6	0	cluster 2	8.62845	7.30737	8.66194	4.99674	9.70435	8.51967	7.64354	3.80098	4.5262	6.16603	8.09577	7.79757	10.2367	11.5988	7.38943	10.0675	10.0208	9.18681	10.3624	10.2118	6.63527	5.94434	3.38436	9.06232	10.0744	6.10693	9.59457	8.55845	10.6899	6.19233	3.72796	7.42847	10.2951	8.89247	11.1897	7.95741	11.2906	10.7449	6.2668	7.17959	9.81186	10.2873	9.06139	4.94346	7.10935	8.52194
GSM519153	3.7	1	cluster 2	8.59261	6.63069	9.10155	5.80166	9.3644	5.93138	7.60874	3.04717	2.69762	6.53126	9.00036	6.05495	7.7238	9.97955	6.70969	11.4366	10.4967	7.90496	8.71376	9.90606	7.27037	6.83386	3.39726	5.88373	9.54387	7.21289	10.3305	6.40949	9.56489	5.90609	2.96011	7.72065	9.71972	9.20301	10.0681	7.65874	10.5162	10.2339	7.97913	6.37352	9.60633	9.53356	9.91229	6.19865	7.16849	8.56166
GSM519154	0.8	1	cluster 2	9.4303	7.61613	9.12105	3.53093	9.71497	6.04966	8.17594	3.26343	4.27209	6.31328	8.81517	6.62483	8.47435	10.8256	9.50352	12.76	10.5549	5.28807	10.1359	10.9259	9.5448	6.97684	4.00857	11.8529	9.42672	7.59797	10.35	8.9211	12.3636	6.38632	3.6756	8.79794	9.57348	10.0702	11.8504	9.15649	10.8002	10.5975	7.05134	6.3961	12.251	10.9598	10.327	5.55647	7.00734	8.3771
GSM519155	6.7	0	cluster 1	8.71109	7.76256	8.77897	5.04188	9.56613	2.89715	9.20479	3.35459	2.54624	8.17794	8.85073	6.93262	9.4937	9.56244	6.77611	11.8987	10.5844	7.06512	9.40971	9.9499	6.90901	7.00849	4.37565	7.71706	9.78551	7.58399	8.55004	6.79084	9.17689	5.93238	2.9685	8.76401	9.31564	9.51617	10.3366	8.72779	11.2447	9.89559	8.47801	7.22144	9.09063	11.2926	9.20965	6.01217	6.06675	7.67565
GSM519156	5.8	0	cluster 1	9.54515	7.10418	8.22837	4.8899	9.54389	5.72982	7.12949	3.445	3.41297	6.32928	7.84639	7.07831	7.11935	9.92688	6.34387	10.8439	9.72089	4.99157	9.64137	8.49858	6.00842	5.27567	2.55374	8.82089	8.24516	6.59014	8.67961	5.83262	10.5117	3.63128	2.53405	7.44006	9.17934	9.31532	9.18642	6.60135	11.0318	9.75593	6.47268	7.67398	8.80292	9.31053	9.61688	6.43295	3.87913	6.65508
GSM519157	6	0	cluster 1	9.50401	7.84653	9.05148	2.9217	10.6222	5.95181	7.72201	2.57633	3.6082	6.51329	8.52163	6.81851	7.69653	9.96134	7.69399	10.9804	10.0713	6.54122	9.05142	9.7712	6.61384	7.56313	2.67962	5.03907	8.04208	6.22281	8.61594	6.05829	9.27469	5.78015	4.00211	8.51873	8.7925	8.96442	9.77053	7.86065	11.0968	9.85931	9.05992	7.35763	8.94075	10.2827	8.9191	3.38922	4.83638	8.05526
GSM519158	6.3	0	cluster 2	9.07534	5.98057	8.37813	5.19513	8.57387	5.85471	8.10296	3.59967	6.23373	10.1097	9.24417	5.21865	7.43405	9.64975	6.83471	10.7602	10.5405	7.25104	10.4103	9.31083	7.05733	7.19059	3.38461	9.36631	9.88079	7.3782	9.4198	6.0061	11.6808	6.1243	2.35398	7.99272	9.16346	9.95823	12.4606	7.62105	11.1423	10.527	6.94631	6.59736	11.4762	10.4936	9.14538	6.33092	6.53219	6.49331
GSM519159	6.4	0	cluster 1	7.41653	7.82448	8.61637	4.71511	9.93832	5.93257	8.15969	2.5387	4.80566	5.46581	8.45966	6.17267	8.13455	10.189	7.5162	10.984	10.9522	6.14468	9.42864	9.90533	6.30878	6.74554	2.72635	7.49336	9.27413	6.63748	9.27138	5.88678	10.7082	7.55122	1.9377	8.58592	10.4146	9.82207	11.4741	8.49064	10.7861	10.2624	7.58746	7.18177	8.8884	10.268	8.39419	4.81178	5.88567	8.57931
GSM519160	5.1	0	cluster 1	9.06861	7.71818	8.50659	4.31789	10.3116	5.85836	9.0047	4.2732	5.52043	5.41739	9.36099	6.96792	10.5103	9.92009	6.82015	11.9355	10.5089	7.04976	8.95309	10.4354	6.91648	7.04979	3.4205	8.99672	9.17809	7.46378	8.30738	6.447	9.9791	7.49945	2.46537	8.49631	10.2681	9.49194	10.8244	8.1596	11.0464	10.76	8.01904	7.34371	8.69289	10.3599	8.04305	6.24825	5.15776	7.36991
GSM519161	6.4	0	cluster 2	8.70062	7.87634	8.74356	4.67426	9.41193	5.93955	8.80457	3.72228	3.06901	7.51962	8.7721	6.39643	9.3038	9.80367	7.04017	11.542	11.2019	7.12887	9.57084	10.3205	8.28767	7.39445	5.3819	10.7444	11.6098	7.50476	8.70659	6.24289	9.47236	7.7051	2.68511	9.04531	10.5386	10.5955	11.2347	8.75965	11.6263	10.2311	7.74632	7.32235	8.9103	10.9589	8.48885	6.23422	6.60395	8.04634
GSM519162	5.9	0	cluster 1	8.97058	8.26957	8.82413	3.59157	9.79715	5.99622	8.16543	2.50445	5.90132	5.13565	9.06401	7.35792	11.5769	10.5049	6.78798	11.172	10.9776	6.78033	9.92507	9.69061	7.31046	7.74172	3.28984	4.97848	10.9548	7.33636	9.36237	7.57161	11.4673	6.31082	1.87597	8.11024	11.3575	10.0434	10.8696	8.10139	11.02	10.3614	6.75891	7.76548	9.01055	9.70763	10.3986	6.11582	6.01471	8.38902
GSM519163	5.4	0	cluster 1	9.40789	6.91571	8.19517	7.07057	9.10819	3.51744	8.16006	4.50361	5.65452	7.69156	8.88086	5.94319	8.49213	10.5032	6.78869	11.3119	10.8178	6.49391	8.95313	10.7079	7.24404	6.94	4.66762	7.19666	10.3261	6.74594	9.44756	6.87014	11.6601	6.66719	2.41223	8.30554	9.60023	10.0078	10.3623	8.03947	11.2523	10.6437	6.99708	5.48006	9.66918	10.5279	9.60167	6.75503	5.82521	7.18855
GSM519164	5.9	0	cluster 1	7.93684	8.38643	11.2653	4.53033	9.84655	5.79766	8.21335	3.85334	2.83757	7.35013	8.47513	6.69973	9.65097	9.79724	6.16286	11.9899	12.6093	6.19421	9.3862	10.2607	6.3385	9.01361	2.49519	6.44096	11.8798	7.16925	9.54761	7.33291	8.92982	9.00913	2.54811	8.41346	10.346	10.8755	12.3467	9.72706	10.7044	10.2304	7.07542	6.9398	9.76423	9.39579	9.44844	6.40008	7.96757	6.73925
GSM519165	6.4	0	cluster 2	9.12243	7.39239	9.39163	5.0832	8.04992	6.51083	7.9662	2.9041	5.51864	5.42109	8.16364	6.88917	9.35203	9.74532	7.08602	11.1467	10.3774	7.10013	9.75334	9.43729	7.11287	7.10328	3.40168	7.59265	12.5107	7.28561	9.52042	8.21979	5.58867	8.67402	2.33183	8.08917	9.50461	9.57416	10.6924	8.46961	11.0756	10.54	6.89393	6.31427	9.18104	9.95595	10.3667	5.71549	6.3242	7.58069
GSM519166	2.3	1	cluster 1	9.32789	7.61741	9.30458	5.39774	9.75109	3.23985	7.34366	5.70029	6.03658	12.6814	8.22993	5.6911	8.57958	8.99338	6.62508	10.8414	10.9032	6.27335	8.6803	10.5288	7.35641	8.18832	3.61518	4.49772	9.46058	6.91467	9.57566	6.9856	13.3645	8.3968	1.91444	8.26559	10.2601	10.2966	9.7547	8.13623	10.2942	10.3632	7.662	7.68646	9.43517	10.5884	10.4012	6.9792	5.55854	8.40492
GSM519167	7	0	cluster 2	9.19784	5.96446	8.62976	5.96935	9.43359	2.77093	7.85838	3.60156	5.34882	6.00406	8.79638	7.04222	8.03091	10.4256	5.98522	10.8299	10.5447	9.50495	8.13365	10.1484	6.13958	7.25779	3.64801	8.66356	9.51665	5.51273	9.63791	6.07278	12.6481	5.3593	2.38916	9.04954	9.36652	9.98758	10.3865	7.40834	11.3595	9.85014	6.4902	7.8601	10.345	10.6554	9.32901	6.53323	5.2677	7.84344
GSM519168	6.5	0	cluster 1	8.60761	7.58348	8.96596	5.21024	10.3652	3.4762	6.82791	3.91505	3.24558	7.01141	9.48351	6.50294	8.39214	9.99661	6.82028	10.7254	11.8459	5.90252	8.8815	10.252	7.20779	7.80776	5.31509	7.72301	12.046	6.37011	9.05038	6.87709	9.85254	5.76962	2.1704	8.35246	10.0001	10.195	9.56637	8.59308	11.3365	10.1034	6.77004	6.96628	8.40874	9.89433	10.1742	5.95886	8.04095	7.02533
GSM519169	6	0	cluster 1	10.2175	6.96354	8.56676	7.2533	10.8942	6.10526	7.91042	3.85142	3.01122	6.56109	8.48751	5.77015	7.15159	9.03063	6.53762	10.9413	9.8583	6.36929	8.57591	9.22614	7.29865	6.68346	3.1816	6.06242	8.26024	6.33205	8.64881	6.37508	9.62731	5.57288	1.98096	8.39847	9.63863	8.80847	8.9605	7.11189	11.009	11.0647	5.45654	7.73026	8.94914	9.47067	8.32476	4.63634	5.04125	7.80185
GSM519170	6.5	0	cluster 1	8.44099	6.35224	9.70128	9.40461	9.53806	2.94698	7.98433	2.90356	4.34629	8.5651	8.68812	7.5024	9.08495	10.4818	6.64765	11.4646	9.79226	7.36456	8.29438	9.72697	6.52128	7.68559	3.49652	8.4211	9.08566	7.63016	9.66461	6.38225	12.0565	7.25032	3.57505	8.6823	9.32745	9.77331	11.8304	7.90139	11.3147	11.583	6.78654	5.70188	10.3993	10.8065	9.30946	6.08072	5.70127	8.31903
GSM519171	6.9	0	cluster 1	8.64879	8.15184	9.48229	5.72125	9.98393	5.71034	7.39144	3.26873	3.14253	8.23483	8.22452	6.47121	10.2361	9.70702	7.00306	11.7145	10.8101	5.75222	8.95938	9.69582	6.84122	7.93206	4.14155	8.67984	10.4466	6.72552	9.07318	7.33456	9.94872	6.29734	2.47456	8.05302	9.70297	10.2596	11.9876	8.52274	10.0848	10.0455	7.06288	7.54397	9.19851	10.6154	9.0595	4.9734	6.60327	7.30547
GSM519172	1.8	1	cluster 2	9.43477	7.82421	9.74364	3.67239	9.49872	5.74242	8.2036	3.24934	6.23074	8.60714	8.50372	7.33388	9.81227	11.4111	10.4372	11.7046	10.7272	6.60382	9.94208	11.0852	9.77787	6.73229	5.59189	11.3589	9.87988	7.11304	9.10232	8.41772	10.3812	7.86598	2.50649	7.96185	10.3374	10.2262	12.589	8.71181	10.7771	10.5414	6.45268	7.37093	11.4009	11.5831	10.1528	4.74075	5.58625	6.97475
GSM519173	6.8	0	cluster 1	8.54285	8.22389	9.07762	4.70159	10.0635	6.4344	8.81814	4.21087	4.85433	6.62132	9.07234	5.91303	8.629	9.72166	5.83608	11.5674	11.2502	6.61817	8.4594	9.17493	6.58305	7.68909	2.84424	6.43167	9.64741	7.26566	8.87424	7.30196	10.1641	8.23821	6.42204	7.93486	9.78377	9.58673	10.7861	8.81775	10.3559	10.1853	8.85241	7.75243	8.61917	10.1954	8.92555	4.57731	6.88577	7.59323
GSM519174	6.8	0	cluster 1	9.24583	7.58082	9.01819	4.86157	9.05121	6.58217	8.67234	2.59944	3.68185	8.11506	9.04294	5.89833	8.40404	9.56114	6.67522	11.1808	10.9107	6.89867	9.35075	9.39485	6.5968	8.40897	3.40497	7.11358	9.79815	6.52718	8.23047	6.40402	10.6758	6.58096	2.09514	8.97543	9.66063	10.0313	10.8372	8.73102	11.1051	10.5346	8.11803	6.29507	8.80527	10.3742	8.82045	5.87235	6.37733	7.59588
GSM519175	5.3	0	cluster 1	8.70783	8.04773	9.66759	6.54407	10.1284	5.16863	7.50841	4.02608	3.21886	9.40326	8.40374	6.97264	8.01338	10.3441	6.88877	9.58315	11.309	7.36896	8.56792	9.73545	6.70517	7.91035	4.99836	5.93643	10.8558	5.65089	8.59327	6.75363	9.70296	6.43475	2.11833	8.51202	8.65179	9.59485	10.9314	8.29232	11.1188	11.0386	5.98702	7.70967	8.11702	9.4658	9.32542	5.9167	5.66781	6.39434
GSM519176	5.7	0	cluster 1	8.54923	7.36084	9.16207	7.18708	10.1413	6.44601	7.39716	4.01201	5.58409	7.10778	9.56184	6.7006	8.57546	9.99524	6.95753	9.36406	12.1298	6.13507	8.71532	9.54858	6.37615	8.4989	5.32716	6.75861	12.3686	5.59067	8.24099	6.27064	10.0674	6.81649	2.00138	8.42727	8.62444	9.24894	10.4646	8.99972	10.909	9.93189	6.66458	6.15296	8.1515	9.7547	9.98083	5.06469	7.39324	5.97615
GSM519177	6.6	0	cluster 2	9.12333	7.83057	8.93922	3.59706	9.11053	6.64717	7.49365	3.96991	5.81367	5.29234	9.08488	8.19092	8.94824	10.2691	8.69916	10.7679	10.9909	8.60909	8.79638	10.9577	7.30842	7.03276	3.32916	6.74994	14.9196	6.46111	9.27935	8.19841	11.3955	8.85108	1.82482	8.04867	9.92807	9.48716	11.2823	8.82213	11.1482	10.8206	6.87572	6.9491	8.18761	11.4864	10.7802	3.75093	6.60608	7.54114
GSM519178	5.2	0	cluster 1	9.35508	8.60388	8.36428	2.879	10.8441	5.33369	9.36661	4.95675	5.76074	5.62966	8.60217	6.71248	7.62259	10.9118	6.05256	9.53387	9.60039	7.1737	8.84497	10.5621	6.78374	4.73062	3.13644	8.88941	8.22084	6.64618	8.84478	6.35485	8.18952	3.34778	4.39293	8.59082	8.81287	9.71508	10.3608	6.4334	11.2897	10.7537	5.9093	7.60081	8.72857	10.0213	10.2245	5.61088	6.08771	6.44272
GSM519179	4.9	0	cluster 1	9.15321	7.28325	8.64479	4.96358	9.87738	5.64485	7.74896	2.4173	2.75668	10.11	8.6509	7.30963	8.33729	11.0706	7.30302	10.3244	9.59337	7.65674	9.64466	10.0128	6.86802	6.73753	3.5415	6.40351	8.60719	6.08545	8.79364	7.21184	10.8851	5.39689	2.41065	8.62848	8.29827	10.0845	9.59421	7.19823	9.78475	11.3864	6.19738	7.02145	9.2487	10.4245	9.41995	3.90612	5.4337	8.33051
GSM519180	5.1	0	cluster 1	7.8428	8.10898	8.10272	8.33978	9.28359	3.71413	7.59946	2.65268	4.30388	9.08166	9.07339	6.63339	8.44031	10.0257	6.02323	9.59799	11.0189	6.43447	8.86842	9.03931	7.15071	8.33356	4.93936	9.67248	10.2466	7.27503	8.16161	7.2655	10.4578	7.99356	1.78849	6.91649	8.641	9.63039	11.2271	8.78671	11.4402	10.5823	8.24157	7.55719	9.41747	10.5226	9.25397	6.58156	7.24084	7.44454
GSM519181	6.1	0	cluster 2	9.70651	7.5223	9.91525	5.4206	8.69297	5.43963	7.8759	2.38823	4.06492	5.44289	7.89338	8.84718	8.26064	11.4045	8.38151	11.1428	11.3438	7.82512	9.3864	9.55999	6.10899	7.28566	3.70591	6.9878	11.3922	6.40131	9.26843	9.9222	9.72049	5.93045	5.97165	7.38118	7.97855	9.34199	10.5673	9.21693	11.2896	12.3661	7.09921	6.60866	9.79602	11.0045	10.766	7.10076	7.12426	8.24189
GSM519182	9.2	0	cluster 2	9.98767	8.18827	9.32602	4.77477	10.1053	6.78549	6.888	3.31978	5.64573	8.04882	9.0696	6.76797	8.43413	10.8174	7.54991	9.75007	9.45644	7.60675	9.51685	8.75315	8.04002	6.08999	3.55514	11.3722	8.22884	6.01713	9.45307	6.51689	11.3941	4.76299	2.50724	9.23853	8.93648	9.78051	11.1075	6.89631	11.9385	10.7757	7.05084	7.04694	10.8583	10.1082	9.2206	6.50342	4.85878	8.26245
GSM519183	6.5	0	cluster 1	8.6009	7.99428	8.80632	4.63053	10.7258	3.12967	7.32201	4.8171	2.16062	4.3269	9.78337	5.98918	7.46289	10.7852	7.05073	9.80756	9.35883	5.47004	7.38958	9.9918	6.7329	6.80006	4.44845	5.42398	8.62613	6.68298	8.90813	5.69791	11.183	6.05745	1.80724	8.58701	9.93339	8.88474	11.3749	6.19377	10.9662	9.57438	6.2772	7.09946	8.7816	8.34388	9.21792	6.24251	4.91992	8.17242
GSM519184	5	0	cluster 2	8.91216	7.90708	9.57164	4.52421	9.31245	3.41118	8.45494	4.14048	2.51316	5.44918	8.59886	8.31282	8.47418	9.67741	8.08453	12.1276	12.5556	7.20888	9.09183	9.56581	6.97412	7.10046	2.55178	9.61595	14.6198	6.7267	9.39154	7.51123	8.46738	5.41997	1.80357	7.71839	9.48278	10.0399	10.8708	8.20897	10.0639	11.4239	6.35063	7.0818	7.88334	10.274	12.8195	4.32372	5.71083	7.6498
GSM519185	6.1	0	cluster 1	9.31643	8.19948	8.40947	4.52781	9.39415	5.64573	8.16887	3.3685	5.41377	9.79922	8.32076	6.04062	8.9358	9.79001	6.21667	10.7463	10.7106	7.50063	9.59099	10.0997	6.63985	6.9108	3.65392	6.09524	10.0312	6.04867	8.33409	7.26004	9.25022	5.62206	3.72134	8.69225	10.0575	10.4634	9.59892	7.1511	11.4372	10.891	7.74461	6.18867	10.1166	9.38716	9.57313	5.49927	7.21262	6.81109
GSM519186	6.6	0	cluster 2	8.77778	7.92185	7.77866	4.16265	9.14929	5.20652	8.07455	4.02784	5.7164	9.27849	9.11333	5.57603	8.1305	9.82753	7.15194	10.5424	11.0244	8.92748	9.13738	9.97425	7.24183	6.04975	3.33128	11.1354	10.3193	5.41832	9.97981	8.68944	11.4022	5.57235	3.54288	8.54352	9.46218	11.0287	11.6697	8.02877	11.3329	10.012	6.49964	6.27256	11.4435	10.6701	8.82996	5.61783	7.15983	7.52561
GSM519187	6.5	0	cluster 2	9.12747	6.86633	7.69817	3.55592	10.7052	3.55798	7.7414	2.74634	1.7409	4.61557	8.35426	5.43505	7.81953	10.5205	7.25572	10.1902	8.89852	5.75771	8.05974	10.6911	6.16636	3.94439	5.34446	4.70346	7.04282	6.51791	7.9954	6.09124	8.52489	3.94205	3.39278	8.522	9.63554	8.3982	9.19842	6.94748	11.2966	9.22048	6.47657	7.76895	9.78357	10.7052	9.51996	6.51958	5.28172	7.89316
GSM519188	6.8	0	cluster 1	6.83688	9.04835	10.6068	3.98607	10.1712	5.34752	9.44617	4.47364	5.18306	9.44053	8.75502	5.49036	11.7352	9.85326	7.18259	14.012	11.6395	6.68649	10.8788	11.5432	8.0985	7.54229	3.94098	7.45865	9.09652	7.58661	8.62669	7.31413	8.59451	9.72512	1.8701	8.96051	11.587	10.4195	12.3181	9.67454	9.79424	9.94898	4.58126	6.99855	10.6819	9.7237	9.11983	5.73316	7.71188	6.67649
GSM519189	6.4	0	cluster 1	9.35999	7.71342	9.09146	4.95101	10.2594	2.21769	8.36295	3.84003	5.36212	6.1024	8.42859	6.19428	9.39219	9.70057	6.96361	11.571	9.54526	6.31393	8.16041	10.4126	7.70989	6.10922	3.4783	7.20209	9.12569	5.90331	9.14433	6.50837	9.93912	7.29948	4.11127	8.4377	10.0924	8.88386	9.69134	7.2302	10.8147	10.7208	8.2065	7.09444	8.97341	10.3575	9.16303	6.38982	5.83071	9.23253
GSM519190	0.9	1	cluster 2	10.9316	6.55614	8.3065	4.68109	10.6315	6.06585	6.52226	3.31168	7.18431	13.2638	8.05629	6.91181	8.2834	10.8439	7.74407	10.063	9.78205	8.8434	8.88363	8.99306	6.69757	6.91286	3.04881	5.93244	12.0479	6.61489	7.98694	6.44687	8.86358	4.10606	2.08824	8.74112	8.50823	9.25545	12.9545	6.94087	10.912	10.5633	6.13842	7.66201	10.3975	10.4375	8.82302	7.69077	5.31222	7.4159
GSM519191	6.4	0	cluster 2	7.73217	7.54616	8.75408	5.43992	9.94292	6.692	8.60738	3.93031	3.55494	6.61498	8.28673	6.207	8.46618	9.20175	7.8435	11.4782	10.369	6.34633	9.52922	9.61802	10.0084	6.72522	3.65974	9.91343	10.6763	7.87699	7.91487	6.66504	7.84676	5.72367	5.28157	8.49029	9.02448	9.19719	10.9869	9.15865	10.9183	10.1179	6.30979	6.82763	8.41046	11.6901	10.489	4.38091	6.95871	8.41307
GSM519192	6.5	0	cluster 1	9.20831	7.80103	9.03506	4.73296	9.63136	6.77015	8.86908	2.20056	2.35676	6.1571	8.51618	7.25485	10.5273	10.6803	7.20333	11.0707	10.2548	5.79909	9.54522	9.3043	6.88499	6.38577	3.19028	5.50325	9.07752	6.97167	8.90804	6.62702	10.9251	5.38687	1.9758	8.62968	9.3294	9.38537	10.0611	7.53311	11.0292	11.0053	8.62494	5.76826	8.59332	9.8978	9.01872	6.43541	5.77783	7.72437
GSM519193	4	1	cluster 2	7.92233	7.65627	8.52675	4.64754	9.21172	5.64093	8.17763	3.17895	5.48939	4.42596	8.60722	6.9808	8.54752	11.2434	7.26472	11.2162	10.2278	5.87088	9.80942	10.3306	8.48222	6.42438	3.23021	10.4128	9.40796	6.78026	9.72328	6.41455	10.3467	6.49222	2.12626	9.4717	9.64537	9.79226	10.8743	8.02389	9.78209	9.72718	4.29474	7.57761	10.2793	11.5267	8.53772	6.26844	7.00859	8.46109
GSM519194	10.6	0	cluster 2	8.15905	7.64161	8.95929	3.95963	9.35059	8.50403	7.57408	2.24572	4.23284	5.72646	7.2144	6.38061	7.94023	9.51786	7.61025	11.3941	9.17644	9.31009	8.77926	9.83545	9.51152	7.67987	3.27541	7.01734	10.1876	6.62428	9.77702	6.18206	9.47137	5.56941	1.645	7.12195	7.86492	7.5968	9.43544	8.51321	10.9565	9.94771	7.12369	6.88656	8.44855	11.0246	10.2713	6.4663	4.76688	9.05288
GSM519195	14.1	1	cluster 1	7.39649	8.70631	10.2096	4.35244	9.98407	6.09497	8.36226	3.10726	5.65794	7.11347	7.94773	6.72642	8.58375	10.3184	6.81657	11.2548	13.8657	6.2745	9.09283	9.63147	6.45682	10.383	4.76226	9.32494	13.7911	5.9428	9.34257	9.20797	10.2996	7.05379	2.05522	8.67713	9.21101	11.3101	13.0657	9.14763	10.7672	9.76048	6.5277	7.53616	9.10395	9.308	9.48984	5.42224	5.86736	5.95459
GSM519196	2.3	1	cluster 2	7.28096	7.16739	9.05508	4.99516	8.61006	5.28641	8.47547	3.0573	3.07259	2.7483	8.66848	6.70552	7.74906	9.01623	7.50417	10.4992	9.82567	6.78334	8.94049	9.74936	7.299	6.5566	3.36447	9.79426	8.42761	6.24575	8.7742	5.97931	9.56124	7.00416	1.8326	7.88826	8.56617	9.48962	10.9424	8.43231	10.8789	9.43745	8.17738	7.26179	10.3575	11.4165	8.78001	5.81216	7.05785	7.93844
GSM519197	13.8	0	cluster 1	8.08212	7.99305	8.89125	12.7713	8.96961	4.97927	7.66278	3.1039	3.45532	6.5806	8.17946	5.69745	6.95438	9.24566	5.75268	11.4419	10.4016	6.52447	7.77179	10.8264	6.10608	7.64352	2.72261	7.19635	9.5352	5.84516	9.6916	7.10557	12.1992	6.52293	1.74521	8.81554	9.05015	9.72516	11.531	7.65284	11.1224	10.8366	7.1885	6.20017	10.2537	10.1097	8.60918	6.54286	6.16147	8.09381
GSM519198	13.8	0	cluster 1	8.63382	7.92469	8.69136	4.76175	9.97699	6.73379	8.22126	3.6082	1.4816	7.98156	8.71832	6.80784	7.6872	9.54824	6.55785	12.0281	10.4027	5.61774	9.03077	9.75815	7.20089	7.08476	2.47158	6.73106	9.66603	6.91689	9.39374	5.96031	11.9531	6.7211	4.46311	7.70795	8.61263	9.28157	10.5336	8.89058	10.492	9.44197	6.46652	7.51073	11.1142	10.2482	9.23228	5.25798	4.14212	8.5849
GSM519199	14.1	0	cluster 1	9.28095	7.43341	8.56309	4.51573	9.45168	6.18241	7.3956	3.08634	4.34915	5.94679	8.51116	6.13364	9.67919	10.6292	6.976	10.9366	9.80012	5.72566	9.46701	9.95869	6.90706	6.20262	3.75097	4.97234	8.70831	6.78969	9.86029	6.05288	9.71007	5.91609	4.80425	8.09467	9.61599	8.99713	10.3877	7.86677	10.7716	9.2587	8.35707	8.0195	9.33421	9.83014	9.4373	5.66103	4.90019	8.03783
GSM519200	4.3	1	cluster 2	7.11286	6.99521	8.33128	4.14008	9.35247	4.89942	7.76241	3.80895	5.451	7.06533	7.72862	7.66421	8.0582	9.63318	8.4617	11.1353	8.60198	6.97363	8.38208	9.24047	6.98989	7.22883	2.90779	10.2948	9.01239	5.90895	9.56245	6.15864	12.1869	5.51149	4.68596	7.95758	7.42821	8.34338	10.9716	7.68343	10.3832	9.71371	8.38268	7.31477	10.5828	10.0484	8.68287	6.20251	5.40022	8.47847
GSM519201	13.2	0	cluster 2	7.88482	7.14664	8.45334	5.64793	9.27844	6.08009	8.53183	5.23922	3.62799	6.47456	8.06347	6.39071	8.43335	10.0782	6.53874	12.1857	10.9417	6.59994	9.11489	9.47344	6.47053	7.18155	2.79832	7.74433	9.46986	7.19587	9.74521	6.76865	9.9158	7.0647	3.48775	8.52366	8.96275	10.0311	10.7831	8.86338	10.8655	9.27843	7.71335	6.43221	9.69669	11.1046	9.3424	5.52187	6.22662	8.20192
GSM519202	4.7	1	cluster 2	9.48977	6.9747	8.76252	5.19846	9.16468	5.76517	7.71073	3.58295	3.35161	4.83292	8.13692	6.549	7.74057	9.33865	5.8743	11.0748	9.72365	6.84282	7.73077	9.99581	7.23026	7.16556	3.90595	5.64276	8.93565	6.76436	9.26168	6.15359	9.6825	5.39085	3.86771	7.92445	8.34809	8.89501	9.93055	7.91601	11.0436	9.89589	7.75729	7.53736	9.63468	10.9604	10.1474	5.88062	6.33995	7.98559
GSM519203	9	1	cluster 1	8.35999	5.93639	9.25044	6.43635	8.79048	5.81446	7.38189	2.77409	5.8038	6.37816	7.93574	5.97692	9.727	8.85125	6.58913	11.103	9.28199	6.15904	7.52436	11.0896	7.30038	5.21433	2.93733	5.34268	8.81848	5.95135	9.77479	6.11162	10.1288	4.96229	2.50115	7.79238	9.22559	8.81761	8.73579	7.46824	10.5067	9.20924	9.52525	7.31243	9.56813	8.99566	9.73723	6.26269	5.03143	6.92716
GSM519204	2.9	1	cluster 2	7.40928	8.11806	7.82455	3.59483	8.78821	5.33104	8.40515	2.56675	3.34593	9.1613	7.47872	6.22568	8.24866	9.51524	7.3242	10.7259	10.5176	6.30607	8.88323	9.45035	6.74002	7.3632	2.62856	10.3879	10.2819	6.18938	9.9251	10.072	13.3176	7.07079	3.73335	8.35469	7.84317	9.76269	11.7813	8.69865	11.3416	9.96676	6.24962	7.25004	11.8241	10.9226	10.3122	7.21605	8.03383	7.8111
GSM519205	11.6	0	cluster 1	9.22813	6.55975	7.90636	4.86351	10.1151	6.02485	7.9349	4.03343	5.39434	7.19085	8.80109	5.97804	6.65638	9.56509	6.34195	10.6774	10.7261	6.41024	7.88096	10.0691	7.10254	7.50366	2.64187	6.4695	9.21575	6.04355	9.1722	6.96452	10.6221	6.97832	2.04594	8.30932	8.67099	9.94129	12.2514	7.77671	10.8148	10.2214	6.86118	7.99463	8.66091	11.0085	9.72279	5.40079	5.01616	7.71944
GSM519206	11.5	0	cluster 1	7.47766	8.06365	9.29474	5.48218	9.8864	5.94479	7.94133	3.63369	5.29663	8.28555	7.96394	5.85092	9.25974	9.85132	6.4309	11.5012	12.2068	6.57794	8.46257	9.66812	6.99011	8.14933	3.32919	7.62848	11.8912	6.60645	9.08124	7.78304	10.4375	6.76192	1.98366	8.82028	9.89366	10.4069	10.66	7.97775	11.1424	9.64375	7.92607	5.82485	8.25678	9.6204	9.0377	6.84259	6.36069	6.891
GSM519207	13	0	cluster 2	8.00328	8.16031	9.16069	4.9667	9.41967	5.69056	8.86218	2.86452	3.33173	6.33059	9.10074	7.64503	8.74231	10.4407	6.95291	12.1778	11.4879	6.66127	9.46626	10.779	7.08605	7.46359	3.1736	8.52619	9.56464	8.0931	9.46958	6.8711	10.7732	8.97585	3.23531	8.82211	9.69419	9.89264	10.7995	9.02163	10.3741	9.484	7.71682	6.98155	8.99807	10.8612	9.89763	5.15745	6.38537	7.56611
GSM519208	13.1	0	cluster 2	9.02678	7.67875	7.97906	4.61787	10.3709	6.04384	8.50137	3.24782	5.85109	6.00451	8.85068	6.93018	8.22147	10.4359	7.41165	12.4347	9.51182	9.05222	8.53681	10.0946	6.83884	6.91145	3.33737	11.4762	9.02406	5.52891	8.23061	5.31474	11.424	6.05003	4.88793	8.78159	8.59322	9.78765	9.42531	7.20678	11.3042	10.9593	6.35773	6.85583	9.63666	10.4073	8.6627	3.53049	5.24784	7.79506
GSM519209	12.4	0	cluster 2	10.7268	6.88203	8.89086	5.0378	11.1454	6.32991	8.10693	3.17283	3.96214	7.87045	7.45525	6.90553	8.54269	10.9718	6.02127	10.7392	10.3224	8.45364	9.59418	9.83653	6.74526	6.83609	3.13487	5.37944	9.09203	6.80405	8.68085	6.43925	11.6559	5.70447	2.93623	9.08099	9.29799	9.732	11.8753	7.29925	10.4746	10.6324	5.01495	6.9477	10.3773	9.83208	9.77907	6.74695	3.76942	7.35341
GSM519210	0.8	1	cluster 2	8.67997	7.56133	7.29772	6.94376	9.23993	0.823624	7.64843	3.66607	7.23764	8.54503	8.56571	5.41181	8.1385	10.6103	7.11121	10.3391	11.3189	7.74507	8.63212	9.8397	7.17819	8.55551	4.12854	8.90747	10.0812	6.20055	9.78498	6.94356	12.4066	6.41667	1.72214	8.59005	9.75282	10.3891	10.7277	8.21175	11.3966	11.2284	6.95119	7.31423	11.6197	11.0282	8.60473	6.83986	6.12625	8.0626
GSM519211	11.6	0	cluster 1	7.46903	7.83169	8.60342	3.97835	9.41109	4.84229	7.4772	3.75785	4.48052	5.34645	8.49076	6.16119	8.32721	9.91487	6.66166	11.4209	11.3115	7.40843	8.30145	10.6918	7.52064	7.55942	3.41363	5.70998	10.0897	6.56769	9.16089	6.6063	10.6859	6.5166	2.21083	8.44216	8.90009	10.1297	10.781	7.45727	10.2599	9.21598	7.03228	6.02193	8.80321	10.0415	9.80244	6.66742	5.85976	7.35222
GSM519212	6.3	1	cluster 1	11.2278	8.20403	8.6367	4.15836	9.81987	5.63415	7.60802	4.13858	5.50178	7.21453	8.96124	6.60981	7.88455	8.72736	7.25368	9.85818	10.8833	5.6597	9.31828	9.231	7.46681	7.45338	4.11331	9.19372	10.8733	6.15106	8.82724	6.09762	10.5677	5.13679	2.76726	8.45262	9.89701	10.406	10.1182	8.0064	11.4111	9.89478	7.60596	6.76884	9.09512	9.74744	10.3248	6.66501	5.51378	7.57
GSM519213	4.9	1	cluster 2	9.30556	7.48116	8.83057	5.70633	10.1878	4.3023	7.75057	3.43454	4.54008	10.9727	8.71385	6.91142	8.17233	10.8574	8.48028	11.741	10.4113	7.72122	8.86605	9.71092	9.2993	8.74904	3.64741	5.04074	9.07015	6.38341	8.73481	5.451	10.494	5.6279	2.60004	7.96592	9.07453	9.37965	9.98543	8.10831	10.9067	10.526	8.8545	7.37814	9.26047	10.9884	8.77584	5.48812	5.47827	9.38942
GSM519214	8.3	1	cluster 1	9.51941	8.20816	8.52948	4.79689	9.9301	5.36315	7.75107	3.45252	7.50086	4.83551	7.32837	5.62614	7.86215	9.40839	6.83595	10.8282	10.1999	7.60072	8.21194	8.57752	7.42092	6.80601	3.5629	5.98219	8.13008	7.42032	8.68227	6.75401	12.1824	4.99918	1.79316	9.0029	8.57829	9.00953	11.8612	7.96482	10.265	9.97477	6.69764	7.33009	8.12031	10.8677	8.56448	6.65596	3.40557	6.6367
GSM519215	13.3	0	cluster 1	8.73464	7.93467	9.4117	5.51043	9.33215	6.54936	8.28338	3.28806	6.07968	6.54615	7.88843	6.75961	8.59976	10.5076	8.85317	11.4991	11.817	6.03343	9.73039	10.2214	8.49373	7.61534	3.93393	9.94301	10.7434	6.88967	9.39112	7.36062	9.58344	8.60202	2.30921	9.08656	9.76278	10.6336	11.5287	9.47775	10.8756	9.50876	6.90844	6.93731	9.95741	11.0739	9.27405	5.32163	6.79723	7.47943
GSM519216	12.2	0	cluster 2	8.77368	7.76222	8.78716	4.32403	9.77215	5.96108	8.67364	4.07225	5.19887	5.86889	9.03244	6.73609	8.53357	9.15328	7.36531	10.5917	10.5739	7.99439	9.05968	10.5255	6.57319	7.42027	3.11042	6.91001	9.50352	6.07909	8.56751	6.78809	10.7198	7.07741	2.0749	8.86348	9.95182	9.92483	10.1221	8.88149	10.901	9.50204	7.56124	7.72126	9.77779	11.34	9.32402	5.1008	5.73046	8.16061
GSM519217	1.3	1	cluster 2	8.68623	7.9864	9.5156	4.14121	8.49576	6.14974	7.55609	3.96333	2.24024	5.90493	8.62169	7.83672	9.14978	9.65587	9.91894	11.298	10.2028	8.38022	9.4445	10.8264	9.69953	7.37393	3.05913	8.88981	12.0435	5.90692	10.595	8.27882	10.9417	5.52089	2.09219	7.37602	9.43314	9.5646	11.4974	9.0223	11.4862	9.92115	6.00419	7.72185	9.54338	10.5997	9.44607	4.15151	6.96325	8.34031
GSM519218	12.2	0	cluster 2	8.29794	7.64855	9.04129	5.07846	8.88144	5.52657	7.06424	3.11742	6.39162	5.34807	8.53042	7.00421	8.11785	10.133	8.90848	11.7307	9.1579	9.38997	9.64866	11.0493	8.5735	5.98994	3.69028	9.88506	13.338	6.1748	9.47165	8.20878	10.0719	5.51865	2.38948	7.67965	7.49754	8.83085	10.2003	8.83345	11.6141	10.6285	6.06163	7.1867	9.13119	10.4519	9.32053	6.31938	5.26514	8.97412
GSM519219	8.1	0	cluster 1	7.37945	8.37965	8.53431	3.90723	9.81618	3.77421	8.08623	2.23352	4.9662	6.3884	8.59023	7.54677	9.98169	10.3638	7.14829	10.4748	12.6968	6.82758	9.59446	10.8794	6.953	8.31072	4.10995	7.25554	11.8975	6.34722	8.66344	8.29534	10.8848	6.50164	2.03263	8.14469	9.6448	11.4129	12.6603	8.54432	10.9768	9.86976	7.52477	6.60861	8.74735	9.78012	8.81162	6.61455	5.96091	7.06885
GSM519220	11	0	cluster 1	9.82539	8.24839	9.06906	4.3244	11.1428	4.81486	7.98083	2.97341	2.99236	5.72719	8.92635	6.72791	9.02398	10.6101	6.91745	11.9577	11.5593	6.81263	8.95694	10.2235	6.754	8.19481	3.20687	6.71209	11.1683	6.01899	8.70804	10.4947	14.0975	7.30283	4.04959	8.33176	9.9037	10.7661	11.3998	8.02305	10.5159	10.1445	7.71912	7.78668	11.7266	10.0914	11.0166	7.43913	4.77198	6.90705
GSM519221	12.2	0	cluster 1	8.82126	7.70699	8.20473	5.08026	9.81166	4.99566	7.60065	3.02283	2.4627	6.24696	8.64428	6.27072	9.08405	9.60663	6.66592	11.045	10.5748	7.10176	9.44249	9.85034	7.84394	7.16464	3.13762	6.33959	9.61286	6.30112	9.22847	6.57168	9.12715	6.19198	2.91094	7.91536	9.08712	10.1321	9.53995	7.91464	10.2782	10.3328	8.29489	7.83353	8.99747	9.66017	9.22632	6.47454	4.37719	7.48072
GSM519222	5	1	cluster 1	8.16837	6.70509	9.02913	5.02727	10.6338	4.75471	6.1694	4.56158	6.12249	5.53284	7.77835	6.58749	8.1665	9.77993	7.14698	10.3939	10.327	6.51572	7.84986	9.83459	6.50193	7.44263	3.38312	5.71548	10.1502	5.23794	9.40059	7.78598	11.1783	5.3613	2.917	8.01511	8.89035	9.46763	11.7937	7.55275	10.4994	10.679	5.817	6.03026	9.57076	10.731	8.68383	6.56924	6.08006	9.04746
GSM519223	1.4	1	cluster 2	9.86377	7.87996	8.94976	4.62079	10.5632	6.92493	8.20093	4.01706	3.51079	5.58584	8.70166	6.22585	9.6592	12.0064	7.4182	11.437	9.92299	7.97997	8.65505	10.5299	8.22169	6.516	2.96957	8.89655	9.64469	7.13746	9.98681	11.2387	14.098	7.54009	4.28031	9.10507	9.83523	10.1105	10.9873	8.21166	10.8466	11.0552	5.83653	7.2237	11.9039	10.2049	10.7278	7.39905	5.32643	8.08463
GSM519224	6.5	1	cluster 1	7.60279	8.05906	10.2076	6.33431	10.0232	3.36539	8.41851	4.12222	6.40835	7.29203	8.70655	6.20732	10.0802	9.29873	4.48933	12.5619	12.3818	6.3009	9.35773	10.5852	6.21488	7.2668	4.63015	6.9725	10.8439	6.25196	9.07644	6.59934	8.98896	8.32151	3.98266	8.46398	10.9646	10.7436	11.301	9.08104	10.988	9.77586	6.22417	5.56708	9.67365	10.2597	8.39214	5.04347	7.71939	6.42074
GSM519225	5.7	1	cluster 2	8.32266	6.92496	8.67024	6.55061	9.47136	5.88356	7.98913	4.28747	5.57456	7.09873	6.99856	6.81145	8.48825	10.9268	7.20592	11.4097	10.297	6.91906	8.43633	9.41091	6.48456	6.52815	5.03345	6.1148	9.27796	7.05576	8.85441	6.50361	11.4147	6.10053	1.84942	8.07637	8.60156	9.1965	10.5802	8.46335	10.5658	9.72222	6.5072	5.18155	10.9514	11.372	10.6424	7.75623	6.23038	7.50775
GSM519226	9.8	0	cluster 1	8.4982	8.25995	8.8056	3.44701	9.14505	5.85305	7.89999	3.47483	5.61614	3.87856	8.45317	6.97728	9.1249	9.70854	7.10089	10.9864	11.325	6.53414	8.02941	10.4128	7.42927	8.01698	4.26	9.08946	10.0737	6.61629	9.54047	6.94678	10.2346	7.54198	2.94934	8.19462	9.94504	9.39602	11.0843	8.12076	11.4822	10.2352	6.87446	6.47361	9.63299	10.3035	8.9474	4.82772	4.44417	6.65224
GSM519227	11.6	0	cluster 1	9.70628	7.90195	8.57241	5.01935	10.4955	6.25309	8.48619	2.90002	2.7165	7.62349	8.34572	6.78763	6.9681	9.681	6.8427	11.0938	11.374	6.51062	8.48825	9.37025	6.45762	6.78188	3.83221	6.34024	9.34185	7.08612	9.10815	6.60291	10.8771	5.66871	2.17439	8.90222	9.69245	9.44548	11.0159	7.47632	10.2701	10.5413	7.33725	6.25216	8.76233	10.0409	9.26374	6.11382	5.55116	7.68166
GSM519228	12.1	0	cluster 1	8.39293	8.51396	8.94812	3.62063	10.2669	6.19827	7.83511	3.44208	3.63193	10.2857	8.58636	6.73108	9.58735	9.99268	6.73815	10.3556	10.7639	7.00351	9.85743	10.1476	6.92651	7.245	3.3346	10.385	9.98702	6.38171	9.82112	6.54891	10.4611	5.92875	2.19431	9.39693	9.73938	9.56871	11.1745	7.93945	11.667	10.4312	7.99733	7.23189	10.1135	10.1236	9.93193	5.24066	6.89287	7.71613
GSM519229	9.2	1	cluster 1	7.53223	8.00396	9.3834	4.92333	9.84708	6.25792	7.82654	3.58629	4.76218	4.45788	7.74152	6.7216	9.66145	9.45808	6.79812	11.3543	11.0306	7.30343	9.13537	9.03101	6.78613	7.07858	3.11422	9.63089	10.2295	6.12772	9.71869	6.68365	10.7678	7.56029	4.04829	8.07025	9.3258	9.88497	11.8663	8.74259	10.2425	10.2914	7.33134	6.70072	8.8226	10.3649	9.62134	4.96211	5.98361	8.24326
GSM519230	12.9	0	cluster 1	8.16663	7.71367	8.83746	4.91613	8.76461	2.67845	8.37473	2.93301	0.987135	9.37069	8.69251	6.76434	8.18821	8.42548	6.88949	12.0817	10.4662	5.62421	9.69272	9.50482	5.56122	7.10542	3.88166	6.10427	8.8793	6.80017	9.09434	6.12772	9.34718	7.54097	2.96657	8.89532	9.04065	9.20678	10.29	9.08588	10.6747	9.0836	8.30684	7.36931	9.01968	11.0572	8.88756	6.33247	5.97085	8.0391
GSM519231	12.7	0	cluster 2	9.67714	7.86588	8.86796	4.09268	8.39171	6.23726	7.02842	4.55987	5.53736	9.97187	8.70336	6.06871	7.75982	10.2539	6.82839	10.3693	10.6034	5.86834	9.65333	9.41462	9.04248	8.2327	4.41138	12.4357	9.57838	6.4592	9.59601	9.01414	12.9554	6.6353	3.50338	8.07807	9.45103	9.83215	11.7292	7.78319	11.5647	10.8679	6.84508	5.16337	12.0731	10.533	10.6455	7.02698	6.47433	7.72032
GSM519232	12.1	0	cluster 2	8.61718	7.9703	9.01909	4.14177	10.3869	5.54306	7.99582	3.487	3.90164	8.02961	7.99876	6.04209	7.24067	8.60236	6.63901	11.8031	10.4195	5.28041	8.60676	9.27667	6.2077	6.29734	4.17016	7.06025	9.12922	7.32095	9.08142	6.74666	11.6293	6.36169	1.86154	9.03774	8.88498	10.0487	11.0517	7.83876	10.1869	11.5278	7.27808	7.06079	9.77833	10.639	9.71086	5.39214	4.97541	8.46853
GSM519233	12.8	0	cluster 1	8.18159	7.86293	8.28463	5.65145	9.96899	6.56949	8.94303	3.67444	3.00438	6.26328	9.12517	6.13553	9.25456	9.56087	6.61519	11.608	10.6277	6.88465	8.75315	9.26987	6.65379	8.11475	2.47251	5.17711	10.0252	6.52143	9.20893	6.5268	10.6248	4.92107	3.9122	8.77092	10.0901	9.69298	9.92938	7.94354	11.1084	9.79457	7.11874	7.10493	8.89454	9.65609	9.06833	6.29001	6.88187	5.89731
GSM519234	10.9	0	cluster 2	9.97896	7.33084	8.78815	5.80239	10.4698	3.6988	6.95814	2.65472	1.88089	6.831	7.60122	6.41078	7.58812	10.0023	7.13407	11.4297	8.79274	5.30059	9.01176	9.44163	6.70537	5.76554	4.54747	9.31467	8.26098	6.87045	7.82066	6.54853	11.1918	5.53494	2.30097	7.7142	9.00185	8.65001	9.48188	7.73369	11.5665	10.9882	6.19683	7.99441	9.91506	11.3218	10.0284	6.55045	5.93825	8.47506
GSM519235	2.5	1	cluster 2	9.39964	7.68763	9.67718	4.21915	10.6229	5.11	7.90729	1.75812	3.52578	5.24275	8.29331	8.11988	8.12577	10.7975	9.45527	11.0106	10.2694	8.02152	8.53599	9.75674	8.11253	7.22436	3.21206	12.7021	9.33405	6.79666	9.58109	8.64946	11.5028	7.21094	3.27467	8.29341	8.88671	9.68062	12.1697	8.55635	10.0244	11.8827	6.30651	7.3381	11.2551	12.5873	9.18685	4.80411	6.11561	9.27133
GSM519236	2	1	cluster 1	6.83045	7.92507	8.38583	4.42671	9.27531	3.37807	8.01479	2.95619	3.67001	5.45549	8.88167	6.7484	9.54247	8.81126	6.82563	11.4671	12.7944	6.74051	9.39926	11.6916	7.21616	8.00111	2.81343	9.07619	10.3973	7.17239	9.67267	7.22548	10.3443	9.4136	2.01291	8.19554	11.0643	10.5021	10.9537	9.81191	10.2705	9.32409	7.22075	6.3622	8.57229	10.6751	9.53082	6.0627	6.87023	6.31918
GSM519237	1.2	1	cluster 2	10.3119	7.91282	8.51953	3.16994	10.2147	6.21644	6.69599	6.33322	3.75912	4.65148	8.90968	8.4567	10.0077	11.7031	11.1085	10.5987	9.48301	7.19546	9.58223	11.391	9.78261	6.09974	3.3259	8.46726	9.28313	6.02822	9.31532	9.33925	11.736	5.11929	1.36931	7.83329	9.44064	9.46622	11.3407	8.28293	11.4503	11.0081	5.51381	7.86312	10.9381	10.2358	10.4598	6.08019	7.00635	9.07253
GSM519238	11.4	1	cluster 1	9.45826	7.79262	10.3161	3.99421	9.9036	5.98928	8.50477	1.97512	4.36249	5.74208	8.45089	6.19417	9.26182	10.6796	6.73752	11.9214	10.4229	6.2654	8.25273	11.7588	6.07196	7.85812	4.27722	5.9988	9.50352	6.11361	9.24141	5.51029	10.7268	7.3049	2.53886	8.20517	9.87519	9.72526	10.7068	8.41577	10.6948	10.6583	5.52706	7.26025	9.59637	10.9804	9.55409	5.07505	5.92273	6.95529
GSM519239	4.6	1	cluster 2	11.9342	6.8866	8.72137	3.32297	9.29878	5.81338	7.99918	4.19886	5.26987	9.76696	8.44811	6.55099	8.53277	11.0581	8.12393	11.2994	10.0112	6.64905	8.25693	10.9282	6.26055	6.74796	4.44317	7.09555	9.29099	6.63592	9.91287	5.59868	10.6411	7.66151	3.30032	7.84074	9.07899	9.05887	10.6182	8.02931	11.8766	10.3636	6.34842	7.42371	10.0673	10.9828	9.31699	4.92035	6.001	8.94274
GSM519240	12.3	0	cluster 1	7.64742	8.23443	9.9955	7.85478	9.4647	5.95648	8.26047	5.05835	7.61624	6.64276	8.46836	6.40057	9.29162	9.74194	6.24091	10.9163	12.6788	6.68547	9.60494	10.091	6.5872	8.67171	4.34535	8.77723	12.1118	7.16267	9.175	8.18593	10.1656	7.26853	1.87597	8.89371	10.6465	10.9165	12.0345	8.63568	11.2907	9.90229	7.00252	6.93236	8.93797	10.8244	9.19066	5.51743	6.3748	7.51909
GSM519241	11	0	cluster 2	9.28533	8.50019	10.0594	4.92067	9.18363	5.84829	7.08767	5.33891	5.29768	7.16239	7.70925	6.54177	8.19974	9.57219	8.54196	10.9206	9.26428	7.47018	8.86457	9.70954	7.09724	6.6609	4.11083	11.3487	8.15811	5.88907	8.59159	6.44998	12.3099	4.3865	2.20868	7.6183	8.45298	9.62176	10.1748	7.18697	11.7425	9.92223	5.35474	7.43683	9.54826	10.941	9.35168	6.37347	4.61777	9.28757
GSM519242	11.1	0	cluster 1	9.53226	8.1728	8.81261	4.42099	9.50958	5.87168	7.92361	3.03308	4.40497	7.92572	8.62715	7.58807	8.94797	10.3518	6.79976	11.0484	12.2309	9.231	9.3546	10.046	6.53679	7.49372	3.2575	4.84555	10.2187	6.49126	9.18006	7.00612	11.7728	7.72917	2.0687	8.88777	9.83401	10.2639	10.8629	8.13041	11.5379	9.94695	7.7368	5.95508	9.78674	10.1689	9.59496	5.427	6.7215	6.99083
GSM519243	10.8	0	cluster 2	8.91704	6.74999	8.55688	4.43086	10.1411	3.64182	7.55927	2.67689	2.99809	5.79488	8.73974	8.74996	8.37582	9.73544	5.36434	10.1352	9.58806	9.20273	10.1276	9.97694	7.23605	6.62373	4.25962	7.55099	8.8698	6.84479	10.3248	9.24681	13.066	5.59402	2.15146	7.96242	9.01975	10.0589	12.0176	7.84195	11.1252	10.776	5.72579	7.46883	10.5279	10.9163	10.1326	7.54058	6.95649	8.22963
GSM519244	11	0	cluster 2	10.3407	7.46365	8.94576	6.19321	9.00845	5.98265	7.43618	2.44074	6.14465	5.50549	7.67293	6.60362	7.62872	10.558	7.23195	11.5943	9.93619	8.15813	10.0842	9.62076	8.38067	7.3196	4.23363	12.0796	10.5602	6.42613	10.088	6.84571	10.9386	5.52846	1.92553	7.93551	8.55932	9.54134	11.4444	7.42699	11.5381	11.0692	3.92075	6.85311	10.7344	11.8159	8.74145	6.6845	5.71567	8.61236
GSM519245	7	1	cluster 2	9.28033	6.60699	8.1995	4.63037	9.31254	5.44041	7.83401	5.56673	2.96586	6.12299	8.13033	6.58421	8.06542	9.36292	6.8314	11.9881	9.40248	7.03782	7.53042	12.3459	7.36493	6.33756	2.73742	7.54344	8.86765	6.63324	9.16437	5.65442	10.9149	5.29793	2.67918	8.0005	8.41047	9.18745	10.5596	7.623	11.3595	10.6774	3.61642	6.03952	10.8999	10.6723	8.92255	4.65283	6.58931	7.88806
GSM519246	8.9	1	cluster 1	7.32787	7.75707	8.81215	3.70791	9.47418	3.10517	7.56658	3.21595	4.80288	5.24255	8.49772	6.62438	8.10926	9.46019	6.67885	10.86	10.8845	6.90875	8.61121	9.6137	6.94871	7.37693	4.77143	8.14319	10.7513	6.23982	9.18883	7.68312	10.1868	5.57085	1.72831	7.46723	9.17071	8.94482	10.8388	8.30036	10.9038	9.44697	6.04713	7.50851	8.90416	9.72905	9.98458	5.88273	6.48439	7.65657
GSM519247	12.6	0	cluster 2	7.82745	5.80465	8.87343	4.78196	9.85293	5.93528	7.07523	3.18896	5.87567	5.9039	7.61267	6.5097	7.32396	10.2699	7.2182	11.8388	9.53597	8.31807	9.15152	9.44343	5.27176	8.71551	4.14482	4.40559	8.90556	6.61978	9.10401	6.02736	10.0928	6.86783	3.17019	7.93152	8.44594	8.6034	10.5969	8.03934	9.95936	9.31751	6.90142	7.85996	9.47585	10.5512	9.01939	6.02449	4.45625	8.66147
GSM519248	5.9	1	cluster 1	8.89246	6.65061	8.64814	5.03388	10.0026	6.40489	6.99837	2.96866	6.8999	6.43747	8.50839	6.86343	7.98541	9.27039	6.54035	11.5298	10.9526	6.14884	8.4094	10.0461	6.86946	8.37208	2.31114	6.64265	10.1248	5.451	9.49033	6.44403	11.8672	5.61988	5.3441	8.73552	9.32645	9.36942	10.6943	8.07314	12.0403	10.1676	6.30622	5.78594	9.23623	10.2261	9.69609	6.08998	6.3084	7.08321
GSM519249	11.2	0	cluster 2	8.58303	7.05464	8.11618	4.58723	8.85098	6.28316	8.18596	3.09154	6.76429	6.31611	8.37459	6.61472	8.78463	10.7493	6.96094	10.9332	10.0964	9.42236	8.84592	9.5401	7.69842	7.16848	3.28317	10.3128	9.63867	7.33664	9.42153	9.24136	10.4979	5.63528	3.68048	8.67279	9.22539	10.3711	11.8241	8.31326	11.0262	10.8008	8.09401	7.58801	10.4493	11.193	9.74518	6.84674	4.73662	8.26782
GSM519250	11	0	cluster 1	9.52207	7.86954	8.33212	4.26532	8.7715	5.28971	8.34717	3.88851	4.35673	4.94244	8.04969	5.9751	8.84866	9.7634	6.76317	11.0409	11.4123	7.45076	8.3803	9.19898	6.975	7.533	3.36064	5.76722	9.7339	6.26267	9.38519	7.17688	11.7622	6.15965	2.79986	8.79324	9.86116	9.25544	11.2796	7.85455	11.1388	10.4572	6.20376	7.18229	8.8436	10.1299	9.12506	6.02302	6.60943	7.14012
GSM519251	11.3	0	cluster 2	9.00702	7.35796	8.92186	4.4088	10.4423	5.74778	7.58059	3.65068	3.27575	5.93634	8.8586	6.47924	8.51042	10.247	7.22218	11.1663	9.41644	10.2063	9.53723	10.4566	9.16604	6.3566	2.77242	12.5714	12.6021	7.20168	10.0805	5.76759	8.10788	5.27629	2.06194	7.48735	8.44089	9.07337	10.0445	8.36104	11.9944	11.6388	6.98481	7.04897	8.48935	10.6145	10.0222	4.23444	6.81713	9.38303
GSM519252	11.6	0	cluster 1	8.40431	8.27205	8.16501	6.44543	9.85764	4.02965	7.8758	1.70231	6.38806	6.48377	8.50583	7.07518	7.99635	10.2293	6.77042	9.80756	11.269	6.3401	9.05987	10.6082	7.14348	8.465	3.3761	7.83065	11.0669	5.49199	9.25257	6.70723	10.658	6.35656	1.99811	9.01927	8.99193	10.1328	11.2356	8.65394	10.7219	10.2221	7.64924	6.34269	8.07927	9.85105	9.47137	5.95939	5.55181	6.57323
GSM519253	2.4	1	cluster 1	7.41116	8.24579	9.80693	4.83897	9.86218	5.7358	8.08304	3.87161	4.92069	8.56287	8.67693	5.44242	10.1409	9.8521	7.06273	12.5029	10.7705	7.37996	9.95902	11.6502	6.59781	7.19514	2.55869	9.37574	9.16856	8.03855	9.34559	7.89147	10.9958	8.9109	4.44005	8.37704	10.6532	10.2063	11.7121	8.90462	10.8335	9.65088	5.62623	6.35358	9.32831	10.5597	9.73057	6.81058	6.52225	7.66868
GSM519254	11.9	0	cluster 1	8.79192	8.07547	8.45617	4.62663	9.36734	3.08118	7.76233	2.05858	2.17171	7.1342	8.70716	6.68565	8.70768	8.92988	6.90064	10.6191	11.2796	6.46803	8.53509	10.6849	7.48056	7.95493	4.99554	8.64607	10.5111	6.26427	9.52253	7.45877	10.0731	8.01157	2.48849	8.57567	9.69849	9.44443	10.4319	8.47859	10.8789	10.3066	8.01976	6.27934	9.05372	9.64603	9.8102	7.19605	6.95845	7.49345
GSM519255	12.7	0	cluster 2	8.57243	7.37578	9.19754	4.68655	9.71537	6.03142	9.16739	3.80064	7.0853	4.9654	8.27895	6.54391	8.29744	9.5038	6.66602	10.5564	10.0047	6.29767	8.67131	9.45285	6.44566	6.16365	3.80232	7.70043	8.42614	5.71824	8.78238	6.58584	10.4121	6.26025	1.54682	9.1985	8.9671	9.09669	10.6152	7.61553	10.4247	10.3246	7.24769	7.68557	9.39595	10.1707	9.71853	5.78529	5.97319	6.79979
GSM519256	12.8	0	cluster 1	8.73168	6.11038	8.27788	4.66815	10.0199	5.27035	7.61973	3.2582	3.18736	8.27607	8.55427	7.09111	9.64294	10.7482	6.91843	9.57443	11.7484	6.2241	9.96386	10.5545	7.34557	7.02697	2.93348	7.74801	10.8031	6.48601	8.63505	7.03467	8.92282	5.55571	3.4566	8.35678	10.4075	10.8156	10.1986	8.26076	11.6713	10.238	7.16963	5.82181	9.05418	10.8349	9.96922	6.16474	7.6273	6.22149
GSM519257	4.6	1	cluster 2	9.14981	7.96918	9.07065	5.48951	9.53135	1.35021	8.2998	2.5289	4.78083	6.60732	8.8516	6.31288	8.41578	9.59225	6.966	12.1382	10.7715	6.79349	8.82046	9.61716	7.15679	7.28836	2.87546	12.0108	9.8028	7.67956	9.08338	6.74104	11.012	7.73308	1.82459	8.68522	9.16994	9.84898	10.9823	8.65638	11.0538	10.6843	7.15981	6.76824	9.05297	10.9314	10.0144	5.95192	6.48712	7.57895
GSM519258	10.9	0	cluster 2	10.7577	8.02944	8.50435	4.89066	9.81527	2.40007	8.10867	2.17217	7.59991	6.25476	8.91545	6.98188	8.73718	9.94585	6.76979	10.7737	10.7795	7.99413	9.32532	9.82569	6.92251	7.47989	3.61338	12.2205	10.1088	5.76251	9.15087	7.33197	10.737	4.91125	2.23352	8.83001	8.91265	10.4318	10.8499	8.41415	12.0628	10.0769	4.13539	7.97598	10.075	10.6679	10.1175	5.19183	4.98497	6.25873
GSM519259	11.4	1	cluster 1	8.60137	8.46228	10.2048	5.63127	9.5666	5.52153	7.87852	3.60071	4.70298	5.46219	8.08644	7.66668	10.3951	9.70664	6.95957	11.8912	11.5624	5.6259	9.1405	12.973	7.75052	8.31732	2.36857	12.118	9.78954	6.55431	9.93962	6.9357	10.4198	9.07542	3.4186	8.01784	11.0452	10.4975	10.8673	9.30545	10.0467	10.6276	6.33605	6.92253	8.98229	10.8661	9.46265	4.17053	5.61118	6.61834
GSM519260	12.5	0	cluster 1	8.71868	8.50084	9.10387	4.28127	10.0144	6.12854	7.81699	3.92468	6.31033	6.86813	9.43167	7.99797	10.6042	10.8167	7.01865	11.3562	12.5068	5.66476	8.9548	11.1516	7.11086	9.06689	3.37612	7.36647	12.6533	7.3799	9.52332	8.49987	10.4745	6.87261	2.66152	8.98773	10.4895	11.37	12.4654	8.52713	10.6419	10.679	2.28159	6.67945	8.90908	9.96352	9.29882	5.60281	6.74895	6.45321
GSM519261	12.5	0	cluster 1	8.70131	7.59835	8.88161	4.66494	9.90645	5.7959	7.40489	3.74601	4.65254	6.63991	8.86466	6.50178	8.30709	9.21403	6.29326	9.63485	10.978	7.18462	9.73934	10.5657	7.69226	7.56903	4.88395	9.71063	10.2704	6.40778	9.24558	7.07911	11.4297	6.79877	3.30262	9.17807	9.58697	11.1409	10.0251	7.39874	10.8465	10.2894	6.66044	7.28579	9.58366	9.72785	10.5006	7.06907	5.92281	7.11564
GSM519262	9.9	0	cluster 2	10.0107	7.60917	9.50896	6.2128	9.9624	5.77638	8.14696	2.56866	6.17774	10.9101	8.62958	7.48143	9.17828	10.2782	6.6735	11.4309	11.0385	7.13127	9.00033	10.0798	8.19971	6.86931	2.67655	8.77344	11.3949	7.42696	9.63001	7.53121	10.1291	5.36633	2.83511	9.10348	9.67211	10.0932	13.1184	8.10167	11.7283	10.7393	5.10528	7.91823	10.3534	10.9545	8.99685	7.14597	6.86098	7.57454
GSM519263	2.9	1	cluster 1	7.37344	8.43032	9.78688	3.77382	9.43399	5.01885	8.8575	3.84233	1.43656	5.44096	8.02538	4.98419	8.70355	10.3499	5.72731	11.6394	12.504	6.21412	9.29427	10.372	6.48594	8.40922	2.61501	10.6616	12.124	7.33498	9.89337	8.32254	11.4906	9.21663	5.10291	8.889	9.98724	10.8187	12.3846	9.63181	10.4038	9.85038	7.18259	7.22354	9.14295	10.4902	9.62851	4.63413	6.72153	7.52121
GSM519264	11.1	0	cluster 2	7.77686	8.00402	8.91109	6.01405	10.0798	6.36623	8.4665	3.49788	3.07177	5.0132	8.3836	7.89965	8.63464	10.5621	5.64326	11.2348	10.0346	7.10689	9.38068	9.54192	6.68813	5.93344	3.71301	7.63556	9.41495	7.05125	8.989	5.88337	11.2951	7.60238	2.29007	8.07075	8.53401	10.0849	10.6347	8.49872	11.2313	10.7627	6.47591	7.23013	10.4234	11.4221	9.29033	6.85773	6.73401	8.84342
GSM519265	5.7	1	cluster 2	10.0778	7.77098	8.28681	4.83838	9.30803	5.89855	6.59835	5.44461	6.07998	5.73989	8.08427	7.15287	8.31963	11.468	11.0036	11.2208	10.2339	8.4589	9.85977	9.89095	9.33423	6.21527	3.9324	11.4074	9.19068	5.68692	9.98984	8.42432	11.2256	4.34593	3.66986	8.3424	9.33491	10.1839	9.56272	7.42397	10.0529	10.58	3.86659	7.21969	11.1211	10.8395	8.86067	6.45452	6.00598	8.22517
GSM519266	1	1	cluster 2	8.43283	7.37816	9.18465	5.29073	9.54795	5.91943	6.56252	4.15134	8.32368	4.60273	7.19246	6.65851	8.81254	9.21568	7.0666	10.8689	9.82536	8.36356	9.25293	9.87311	8.9848	6.99949	4.55564	12.3793	8.65512	6.92399	10.0362	10.9256	10.9591	5.49109	2.17301	8.62872	7.62339	11.6525	12.6195	7.81169	10.3272	10.7247	6.16132	6.18627	10.6681	11.0534	9.24656	5.21724	7.31364	6.98295
GSM519267	13.1	0	cluster 2	9.55626	7.68771	9.42906	5.54979	8.48357	4.95242	8.95896	4.1246	3.71571	5.45412	8.13855	5.93777	7.22179	12.0444	8.76321	11.9454	9.53087	7.83254	8.67557	9.25201	7.15185	6.59491	3.19886	10.2963	8.4382	6.99903	10.286	6.67617	11.738	5.86526	3.22556	7.65488	7.79704	9.60453	9.8679	6.71818	11.4849	9.089	6.67995	7.36167	10.3376	10.4311	8.85266	6.38929	4.9793	8.39663
GSM519268	11.1	0	cluster 1	6.70791	8.41681	9.70263	5.29455	9.60208	5.55368	9.07621	3.32651	3.30505	6.61051	8.263	6.78593	8.74313	8.6862	7.15777	12.0981	11.7734	6.71415	8.99311	9.88461	7.31856	7.39915	3.93966	8.47219	10.59	7.31997	8.64593	6.54634	8.7082	7.10991	1.82236	8.51829	9.20593	10.1841	11.2746	9.17125	10.6749	9.66048	7.52517	6.59413	8.86573	11.1513	9.56187	6.56742	7.90213	6.87169
GSM519269	5.5	1	cluster 1	8.31014	8.46668	9.20635	4.28881	9.21881	5.66022	7.87644	3.92821	4.5344	5.99055	9.31428	5.82362	8.17829	9.75205	6.64853	10.4665	12.7756	6.31212	9.36476	10.2909	7.37824	7.82991	2.8644	9.2179	11.6084	6.83883	9.22603	8.42423	9.15434	8.10708	2.66083	8.69629	9.98445	11.2595	11.5034	9.51272	10.6135	10.0271	7.53088	6.99302	8.45529	10.8467	8.95221	5.29096	5.30301	6.9916
GSM519270	12.1	0	cluster 1	8.00928	7.87893	9.28995	4.97296	9.51369	6.73752	7.51141	3.23092	6.79269	3.99478	8.27106	6.297	7.98596	10.4617	6.86787	11.4902	11.0792	7.65644	9.72555	10.0863	7.48321	7.19867	3.30593	6.82718	9.51845	5.48724	9.56927	7.31261	10.8104	8.04521	4.636	9.22864	9.55759	9.68005	10.5575	8.41542	10.2226	11.0157	7.07938	7.6537	9.12936	10.1699	9.37295	4.81081	6.13947	8.70194
GSM519271	9.4	0	cluster 1	8.49279	7.98078	9.10125	4.15979	9.55251	5.21018	7.97887	3.95972	5.69084	4.76877	8.79087	6.13743	7.17003	9.7559	7.09995	11.3547	11.3379	6.9085	9.03324	9.3434	6.44488	7.75348	3.69302	6.47964	9.98118	6.89288	8.32769	6.76371	10.9877	5.81419	2.12584	8.8725	9.27856	9.98178	10.7007	7.69127	11.3713	9.85649	7.10905	5.65202	9.14562	10.4635	9.14712	5.56902	4.79371	7.6502
GSM519272	11.1	0	cluster 2	10.084	8.17226	8.82144	7.50942	9.18511	3.72018	7.04043	4.95997	7.20403	11.6845	8.35764	6.35029	8.09977	10.6916	7.24088	10.7628	10.3865	8.52309	9.79253	10.0598	7.60262	6.9191	3.5194	8.97859	10.4176	5.93746	9.22194	8.82114	11.1723	10.7682	2.22692	9.22378	9.13827	10.3875	13.0303	7.72304	11.7323	11.3501	7.0145	5.79564	10.5666	11.0409	9.60642	7.29432	7.37853	8.22577
GSM519273	12.1	0	cluster 1	9.15308	7.57379	9.16749	8.82354	9.61948	5.81246	8.91777	3.68686	3.77544	7.72403	8.36291	6.13646	9.33975	9.75803	7.13102	12.8191	9.97903	5.85394	9.12309	10.5534	6.69023	7.02845	2.72076	7.80513	8.29788	7.24936	8.67763	6.68311	11.3425	6.93378	2.26133	9.18509	9.58013	9.36761	10.9964	7.88946	11.7528	11.6271	6.45897	5.75687	9.69924	10.3189	9.52836	5.49465	5.43288	8.29143
GSM519274	10.8	0	cluster 2	9.09092	6.74787	9.30523	3.03836	9.56567	6.74856	8.24002	3.96075	5.56536	6.68868	9.65967	8.66484	9.336	10.8351	7.40115	11.3797	9.9691	9.3608	10.7639	10.2065	10.1092	7.3844	3.44337	10.7545	12.5506	6.50212	8.3093	5.86987	10.2605	5.23609	2.10639	6.73115	8.76726	8.27169	11.2864	8.33943	11.6109	11.5604	4.89723	5.72753	9.49404	11.6426	10.9189	5.81229	6.08154	8.6232
GSM519275	10.2	0	cluster 1	8.82372	5.30348	7.6817	4.45111	9.42874	6.41177	6.85029	2.99201	4.18178	3.02031	8.91715	6.8845	7.58907	11.36	7.10789	11.4944	10.0797	6.53989	9.60932	10.9984	6.95756	6.51077	4.52679	4.98038	10.152	6.27037	9.05125	5.08081	11.8882	3.68304	2.08855	8.46246	8.98402	9.06496	10.6106	7.31704	10.8024	9.94949	8.43076	6.49888	9.32991	11.0795	10.6646	8.0324	4.25782	6.31714
GSM519276	12.4	0	cluster 2	9.69184	7.5502	9.98475	5.01872	9.29387	6.80282	7.5014	2.48346	6.77939	4.35269	8.70663	6.34977	8.72094	10.6014	6.4388	11.148	10.5137	7.00889	9.14961	10.0175	8.62565	8.26801	3.7361	13.069	9.702	6.87779	8.83899	6.72166	10.5892	7.71345	3.60139	8.78929	8.385	10.3754	11.2351	8.11539	11.0442	10.8804	6.62616	7.16209	9.34484	10.6732	9.73005	6.5825	5.56584	9.0421
GSM519277	7.4	0	cluster 2	9.44765	7.77266	9.69681	3.41704	9.9104	6.27954	7.80006	3.11283	2.01077	5.30834	7.87658	8.74028	8.70863	10.6871	6.86977	11.3828	10.8915	9.87135	9.5091	9.5757	9.34229	7.68008	3.45942	5.43023	11.2984	7.28793	9.55085	7.44716	8.88613	6.32359	2.07199	8.0137	9.04071	9.25719	10.7452	8.41957	10.8163	11.3572	7.37583	7.82881	8.75679	10.3586	9.56459	5.75171	6.2621	8.44577
GSM519278	11.6	0	cluster 1	8.68344	7.92206	8.48039	11.0924	9.50517	6.77404	6.28577	2.88783	2.50412	5.38096	8.83065	6.09459	10.2458	10.4264	7.03873	9.69169	10.553	7.23369	9.16823	12.1915	6.61527	7.68549	3.3357	8.07534	9.80581	5.64237	9.3679	7.15145	10.5675	5.25634	2.57163	9.23027	10.6704	9.92905	10.8473	7.23925	12.0789	10.5128	8.17444	7.92067	9.75382	9.23893	9.42356	6.29321	5.9666	7.19175
GSM519279	7.5	1	cluster 1	9.09527	7.79851	9.20036	5.58881	11.3244	8.99504	7.03017	11.0975	2.34043	6.00897	8.84638	6.65201	7.79362	10.0461	6.41007	11.314	13.0627	6.24366	9.62188	11.2437	6.11638	6.86764	3.24563	5.10572	11.2707	5.52647	8.24295	7.72422	7.7765	8.87384	4.07188	8.55672	9.77267	9.89006	11.9435	9.08137	11.3164	10.2357	6.49599	7.59414	8.68763	11.5194	9.70827	8.40082	4.04505	7.62319
GSM519280	2.2	1	cluster 1	7.68429	7.69193	9.03812	4.41619	9.30317	1.65021	8.01968	2.99496	6.47492	8.19562	8.34671	6.97057	8.12154	9.9993	6.33277	10.0158	11.5667	7.02452	8.41235	9.52425	6.7913	7.68043	4.54723	8.76763	11.0456	6.13327	9.52697	7.07028	10.6936	6.41434	2.21323	8.43567	7.73983	9.96075	10.7955	8.64984	11.4286	10.7567	7.26856	6.00231	9.15633	10.4642	9.36152	7.00909	5.42231	7.49427
GSM519281	7.1	0	cluster 2	8.52042	7.66059	9.50374	4.51022	9.29288	6.68289	8.55703	3.784	3.74125	5.03292	7.76339	7.0422	8.52395	10.4119	10.7183	10.1327	9.44628	8.91034	10.3539	9.73791	9.88429	6.3483	4.25727	8.59358	11.8523	6.58434	9.42035	5.64306	8.41569	6.09151	5.03335	7.96662	8.81672	8.77529	11.9373	8.74646	11.8711	11.0504	7.94795	7.23005	9.48379	9.37603	10.0067	5.825	7.04879	9.40435
GSM519282	10.2	0	cluster 2	9.5583	5.55117	9.2626	6.52392	8.94363	5.87567	8.57279	2.28602	4.37036	7.99657	8.11749	6.98038	8.37157	10.0698	8.57007	10.9981	10.5328	5.33185	9.25843	10.0169	6.73905	6.7455	3.03485	8.55222	9.99615	6.75953	9.00801	9.6933	11.6173	4.80825	2.04253	7.75554	9.22808	10.009	12.8727	8.69675	11.7374	9.91938	7.34575	5.676	11.5402	11.3851	10.3461	7.26374	6.93368	8.07215
GSM519283	10.3	0	cluster 1	8.98459	8.0687	8.79207	3.2647	10.7314	5.54005	7.85274	5.45426	4.98294	6.71037	7.99273	4.93447	7.5283	9.07489	6.20266	11.5924	11.1267	6.42954	8.87326	9.45671	5.74229	7.74477	2.05347	7.00411	9.68423	7.72106	8.63681	7.59022	11.3241	6.06501	2.13207	7.25362	9.65095	9.96993	10.4786	8.36168	11.3073	10.5304	7.36033	7.34447	8.96972	10.4395	8.95909	5.44427	5.20286	8.01537
GSM519284	11.8	0	cluster 1	7.70968	8.0165	8.68563	6.81249	9.25308	6.60184	7.89214	2.88699	3.0067	9.10155	9.20737	7.83856	9.00427	9.80092	6.69754	10.2978	12.2382	5.25454	9.00231	11.8845	7.07499	7.88372	3.02999	7.51355	10.3122	6.83857	9.05067	7.62202	10.1948	9.11215	2.13411	8.43716	10.1294	11.0254	11.1556	9.21515	10.7989	10.0385	7.42461	5.93094	8.41828	10.2304	9.16453	5.29829	5.83456	6.23298
GSM519285	11.5	1	cluster 2	7.22182	7.56631	9.23611	3.58036	9.43602	5.62048	8.01221	2.81141	4.34597	5.1891	8.66391	5.94621	8.11074	10.1762	6.52961	11.3034	10.4981	5.68284	9.47849	10.9285	7.04108	6.91663	2.909	6.41457	8.98664	7.77717	10.0248	7.06813	10.3868	6.66426	1.88642	8.23168	8.94442	9.50775	12.4091	8.38604	10.1692	10.8474	7.24231	7.25496	10.1362	11.151	10.0945	6.33919	5.57727	8.50778
GSM519286	10.5	0	cluster 1	8.44832	8.0975	8.24395	4.3845	10.1521	6.22273	7.69591	2.6889	4.89758	5.99095	8.53048	7.11517	9.46184	9.85449	7.14949	11.4806	10.9065	5.96073	9.28822	9.0783	7.04313	7.70503	4.58548	5.67601	8.90431	6.81768	9.61936	6.11494	10.6004	7.50701	4.81556	9.06106	9.23406	9.74018	11.8301	8.6453	10.476	10.0358	6.57509	7.6042	8.97079	9.81467	9.34242	4.10884	6.61826	7.95538
GSM519287	11.7	0	cluster 1	8.37263	7.99417	8.75626	5.29656	10.0963	5.0618	7.84917	3.40457	5.42985	10.1682	8.91838	6.67346	7.42082	9.73692	6.68556	11.2842	10.855	7.22955	8.8275	10.044	6.93885	7.94291	3.15863	7.81992	9.62306	5.60852	8.67949	7.13301	10.7958	5.57636	2.0817	8.92114	9.54171	9.30772	10.8016	8.06938	11.0173	10.5205	6.18836	6.8214	8.70562	9.94595	9.83718	5.72371	6.11768	7.84117
GSM519288	11.7	0	cluster 1	7.33703	7.92914	10.1636	3.89194	9.64136	5.30387	7.89543	3.34132	2.361	7.37896	8.29822	6.54368	9.81052	9.5144	6.65577	11.3696	11.272	7.8472	8.64268	9.60132	6.40613	7.96345	3.30719	6.70643	10.3107	6.91136	9.36395	6.52275	10.8011	8.1148	2.30379	9.22161	10.3068	9.8871	11.3524	8.09084	11.1066	10.4686	6.52228	7.61897	10.0677	9.79043	8.95266	5.74482	7.03753	7.86606
GSM519289	1.6	1	cluster 2	9.63526	6.45706	8.46584	4.21642	7.70751	5.32067	7.2052	3.28344	2.08139	5.52482	7.90415	5.82924	7.83058	9.43783	6.91615	11.4209	9.38272	5.04186	9.69461	9.83563	6.18003	6.6687	3.82237	8.26309	8.26882	6.53091	9.99538	7.95421	12.3786	5.71628	1.94151	8.69455	9.13489	9.28349	13.2434	7.55665	11.8285	9.96377	5.55019	7.20677	10.8017	9.91197	10.2695	5.99516	5.32793	8.19456
GSM519290	10	0	cluster 1	8.72405	7.97709	8.88835	4.43997	8.9277	3.28568	7.53735	3.32282	4.23329	4.98987	8.27529	6.61146	9.57312	9.06273	6.32706	10.3586	11.303	6.6979	8.61086	10.0122	6.94546	6.95016	3.05595	9.1923	10.2704	6.3498	9.14956	7.34083	11.3464	7.73201	3.29311	8.02877	10.381	9.54077	10.255	8.10688	11.3299	9.95616	8.34093	7.31445	8.91524	9.72837	9.26062	6.13653	6.36986	7.49816
GSM519291	11.7	0	cluster 1	8.5474	8.16957	9.13083	4.31034	9.72895	4.61599	8.62278	4.33466	1.60187	5.5175	8.42024	5.09149	10.0813	9.38429	6.79555	11.9998	11.2088	6.04734	9.77921	10.8623	7.04533	7.49992	3.14053	6.00575	10.0687	6.86636	9.36019	7.19997	9.056	8.35575	1.81445	8.51956	10.9834	10.0767	10.3441	9.39251	10.8789	10.3822	7.07893	7.43217	8.90181	11.2827	9.32036	4.7475	6.19247	7.19405
GSM519292	12.5	0	cluster 2	8.75672	7.64823	8.80896	4.44061	9.61118	6.23914	7.95768	3.40851	2.18236	5.83493	8.36018	6.96816	9.09829	9.95294	7.40047	11.8372	10.7673	7.99566	8.85418	10.3709	6.06167	6.68594	3.68352	11.417	9.45254	7.39254	9.42702	6.26536	10.5395	9.19136	2.70111	8.25001	10.4863	10.1094	11.386	8.68416	9.91927	10.2445	4.28104	6.30466	9.10644	10.3073	9.05445	6.17146	5.98214	8.15329
GSM519293	1.3	1	cluster 2	9.18049	5.04911	8.90731	5.11066	8.30881	4.18407	7.81174	3.40001	2.4596	8.10995	8.47554	6.19955	7.86732	9.48777	5.87382	11.4691	10.0591	9.36761	8.33442	10.2848	6.46063	7.02876	3.58592	8.80613	9.36374	7.04456	9.13539	6.64928	10.4056	8.24663	2.31118	8.43387	8.93286	9.78576	11.454	7.78077	10.5512	10.7994	6.62642	7.6517	10.2306	11.0663	8.51889	5.50647	6.36202	7.83861
GSM519294	10.2	0	cluster 2	9.56482	7.02709	9.19207	3.9942	8.77402	6.49929	8.93345	2.35159	5.95362	10.0422	8.63122	5.51151	8.94963	10.4503	6.70228	12.5098	11.4031	8.76039	9.62756	10.3864	9.57026	6.71827	3.67865	10.8787	10.545	8.17392	8.76829	8.27531	8.96222	7.75477	2.10431	7.83649	9.61691	11.2361	11.8884	8.99341	10.513	10.1606	7.16138	7.42071	9.8655	12.2252	10.1449	5.36351	7.04139	7.86175
GSM519295	10.4	0	cluster 2	8.50265	7.79952	8.8403	4.38781	9.76477	5.54463	7.20688	5.16483	4.98248	5.75457	7.87479	7.43109	8.82842	9.63205	7.35912	11.7913	9.7926	9.43848	10.1632	9.4689	7.47156	7.17109	3.30515	6.53288	9.3137	5.87028	8.86215	6.28525	10.1464	6.03216	4.78539	8.61084	9.00287	9.4236	11.1598	7.86397	10.2785	9.89277	7.38724	8.03738	9.37202	10.2803	9.3114	5.83144	5.71121	8.72262
GSM519296	11.2	0	cluster 2	10.0263	7.65291	9.08488	3.36229	9.02356	5.59578	8.14866	2.61764	3.06847	9.85909	8.90742	6.83918	9.46249	11.0683	7.18125	11.5147	11.2014	7.91218	8.79565	10.2141	6.43006	7.4575	2.65365	5.36096	9.43419	7.75794	9.50767	6.89524	11.551	7.4037	1.72642	8.47204	10.5038	9.69355	11.8367	8.70359	11.7552	10.2735	5.71464	7.54482	10.1262	11.1493	9.49712	4.07092	6.5705	7.85064
GSM519297	9.8	0	cluster 1	8.88577	8.26503	8.91051	3.95131	9.69237	6.85051	8.01227	3.39351	3.61497	8.27427	7.86394	7.08588	7.66727	9.3736	6.26046	11.0313	11.0271	5.57075	8.91193	9.59315	7.59472	7.39655	3.77004	6.93686	10.0988	5.86094	8.41097	7.28426	10.9295	5.3913	2.06755	8.14398	9.79022	9.59757	10.2013	8.21078	11.6774	10.2007	7.60567	6.35405	9.61834	10.8971	9.43624	5.2646	5.61074	7.46779
GSM519298	1.2	1	cluster 2	9.30558	7.34037	8.38513	4.44121	9.86285	6.04573	8.33035	3.40909	6.55918	8.87145	7.97669	8.04387	7.75923	11.0594	4.73048	11.7801	9.77843	8.06281	10.2215	9.07814	6.60316	6.12771	2.87891	6.79151	9.3859	7.4221	9.55832	6.23665	10.9379	6.7752	3.56077	8.48389	9.40311	9.90977	12.1502	7.9325	11.5951	10.0806	6.59229	7.41809	10.4054	10.9768	10.0324	6.60737	5.7677	8.03639
GSM519299	9.4	0	cluster 2	8.26436	8.2527	8.82819	4.41009	9.19418	6.48318	9.07055	2.73409	2.22876	6.9147	8.79648	8.70959	8.38882	10.1699	6.63408	12.471	8.84672	8.00146	10.1167	9.66793	9.20659	6.09993	4.26364	9.57882	8.80927	8.57882	8.8981	9.42566	11.2268	6.26467	2.06134	8.1864	9.27679	9.46616	11.5579	8.59762	10.3206	11.8929	8.75439	7.45314	9.99045	11.654	10.7185	6.02195	6.78306	9.32792
GSM519300	11.3	0	cluster 2	9.59575	7.7258	8.87867	4.6989	9.32677	6.54698	7.99915	4.54008	4.79151	6.91211	8.32756	6.92641	8.40788	10.3233	6.34999	11.4029	9.78096	6.87822	9.46029	10.4309	7.07263	7.19992	3.75052	6.30112	8.85795	6.61853	10.9209	6.0262	11.4071	7.59015	1.5622	8.54583	9.31384	9.23957	11.5133	8.21532	11.5086	10.66	6.86697	7.5231	10.0695	10.6072	8.68552	6.00009	6.50912	8.45707
GSM519301	10	0	cluster 2	8.46509	7.88853	9.9849	5.22615	9.43279	8.52361	8.84546	4.73349	4.17041	6.04665	7.88105	7.06233	8.03031	11.0642	7.56672	12.2439	8.79994	10.1602	9.61346	9.07491	10.596	6.04129	4.35019	11.0586	8.58051	7.7316	10.1391	6.52702	9.68243	6.17465	2.55125	7.67442	8.80313	8.78392	10.6511	7.94076	9.93752	11.6782	6.38835	6.83834	9.42687	9.94506	10.1765	6.22478	7.18449	9.26748
GSM519302	11.5	0	cluster 2	9.14541	8.35821	9.98615	5.67388	9.80592	4.1869	8.47142	2.65355	1.45372	6.70667	7.79353	7.37849	8.79506	10.8011	9.04009	11.8502	10.7144	7.5317	9.70441	10.1391	6.49518	7.23957	4.05954	9.51895	14.1233	6.03357	9.74569	6.62325	8.51815	9.34764	1.59703	8.11717	9.44244	9.50022	10.8866	9.10615	11.2753	10.1094	4.40204	6.1459	8.55511	10.7254	10.501	6.38321	6.05944	6.43382
GSM519303	7.1	1	cluster 2	9.36626	7.09935	8.23007	3.4583	10.292	5.23107	7.15791	3.98893	6.20934	5.37589	8.22901	6.73014	7.46487	10.4067	8.42317	10.1327	10.8088	8.35679	8.94036	10.3229	6.54016	7.20647	3.64888	7.76249	9.13011	6.41588	10.5963	6.18778	11.2616	5.72491	6.18338	8.61787	9.05945	9.91586	11.8695	7.74945	10.7768	10.6224	6.01519	6.85489	9.39721	10.5949	9.00581	6.47737	5.86243	9.75306
GSM519304	2.1	1	cluster 2	9.06344	8.38095	9.38175	4.2792	9.16236	6.43052	7.41412	5.95648	6.75106	5.92047	8.59445	8.17866	8.04926	10.7223	9.04009	11.9613	11.0865	8.44302	8.93142	10.4325	9.74273	6.57524	4.03401	6.60866	13.0556	6.71672	10.0421	6.23955	10.2376	4.98833	2.26286	8.72344	8.96742	8.83067	11.8261	7.08724	10.9687	11.0959	5.88437	7.34839	8.8629	10.9037	9.57235	5.12691	5.52687	8.59773
GSM519305	1.8	1	cluster 2	8.57547	8.02674	8.57908	4.21792	9.24457	6.2772	7.26939	4.15742	6.25857	6.43289	7.90354	6.76293	8.72449	9.77009	7.34161	8.91293	11.2111	7.38892	8.75683	10.3272	6.95214	7.15351	3.44746	9.76128	9.19006	5.98169	10.7949	6.60921	11.5563	6.39463	2.15751	8.31601	9.573	10.2088	12.3892	8.04148	11.0889	10.4426	6.86145	7.77945	10.1448	10.9419	9.61212	3.55809	7.61832	7.87908
GSM519306	5.8	1	cluster 1	9.9359	7.92675	7.97018	4.9522	10.0728	3.48061	7.02525	3.01777	3.63835	4.23029	8.30621	6.36149	7.64579	9.59661	6.41719	11.4234	10.3297	7.31076	8.5955	10.0156	6.74787	7.1484	4.0784	4.83579	8.75662	6.29922	8.99229	6.43377	12.4715	5.68131	2.03404	8.6614	8.9752	9.84528	11.198	7.88909	10.9594	11.4373	6.31118	6.36283	8.35495	10.3409	9.4709	4.72842	5.77347	7.62001
GSM519307	11.3	0	cluster 1	8.58601	6.79655	8.85214	5.64888	9.39316	5.41588	7.88993	3.16959	2.18048	7.89033	9.31603	7.27736	7.98539	10.314	7.3381	10.3684	10.6043	10.5184	8.59076	9.65237	6.97706	7.57429	3.61356	7.07214	10.2229	6.94868	9.17551	7.48466	10.8891	6.25868	2.77918	8.3565	9.32584	9.91819	11.9389	8.45101	11.3456	10.1832	7.62625	7.78469	10.1466	10.082	10.3548	5.77962	5.74442	7.11595
GSM519308	11.1	0	cluster 1	9.91935	7.64414	9.05147	5.14024	9.11512	5.9824	7.55034	2.92552	3.67973	5.32893	8.34374	6.88522	9.51335	10.1977	6.59952	11.101	10.6581	6.33134	9.0201	10.6691	7.02301	7.53508	4.44076	5.76502	9.65406	6.6613	9.44615	7.26617	10.5756	8.88496	3.8397	8.9311	10.1535	9.0864	11.1903	8.30393	10.9985	10.5129	7.55432	7.49014	8.6987	10.3518	9.48583	4.3562	6.46858	7.72263
GSM519309	1.6	1	cluster 1	7.33302	7.65648	8.20497	6.2284	9.86054	6.21977	7.89245	2.76334	1.89565	7.34015	9.88434	7.064	8.90351	9.28801	7.41554	10.7271	12.416	6.3329	8.95403	10.5443	5.6986	8.21599	4.87439	7.993	12.3597	6.26031	8.92707	6.60534	10.2256	5.60288	3.05875	8.13689	9.4752	10.7482	10.2062	8.74123	11.2263	9.59718	7.21901	6.29225	7.44223	9.72768	9.67203	6.40257	6.36032	7.05901
GSM519310	3.1	1	cluster 2	9.24133	8.08852	8.51295	5.16417	9.6199	3.7781	7.78925	2.95647	4.62324	5.96078	8.09753	7.22691	7.74701	9.23599	7.09621	11.3354	10.0392	6.38168	9.01025	9.85244	6.3645	8.00307	2.89189	7.4052	8.87691	6.75755	9.36512	6.76306	10.4102	3.6892	1.99473	8.39894	8.71347	9.11604	10.7618	7.55003	10.5863	9.83823	6.97141	6.84798	9.62542	10.873	10.2241	6.40245	6.14168	7.83831
GSM519311	9.5	0	cluster 1	8.30001	7.56411	9.30466	5.71428	10.0681	5.9932	7.37672	4.13148	0.869015	6.98724	8.0164	6.71738	8.58538	9.58276	6.40232	11.7737	10.92	5.94332	9.72167	9.40225	6.90712	7.99677	3.7272	8.23083	9.23211	6.00187	8.70284	6.92396	10.8938	7.9398	3.76375	8.2033	9.35561	9.76855	12.3637	8.32377	9.33743	9.55614	7.64137	7.31545	8.48714	10.5321	9.3559	4.22983	5.50125	6.68015
GSM519312	11.1	0	cluster 2	9.03261	7.11936	8.62673	4.83894	9.31048	6.1115	7.1616	3.53321	2.43391	5.75551	8.21375	6.89283	8.17164	9.2342	6.87841	10.2751	10.0591	7.64296	8.59879	9.68767	6.64648	8.45523	3.3188	9.63265	11.6872	6.11591	9.62314	6.88205	9.95616	4.93625	3.61193	7.45029	7.33254	7.90305	10.1759	7.82051	11.146	10.6063	4.63701	6.27976	8.80083	10.3973	10.1171	6.09905	7.72287	8.61813
GSM519313	11.4	0	cluster 1	8.97147	7.70282	8.6654	4.80187	9.55461	5.98456	7.51233	3.04847	6.29268	6.57874	8.42922	5.83273	8.02966	8.73187	6.75877	11.0313	10.6041	7.07884	8.85506	9.77172	7.75418	7.42942	2.27293	6.05476	9.83191	6.4314	9.14121	6.64595	10.6705	6.11644	1.8326	8.79888	9.3347	9.40003	10.2561	7.8823	10.5268	10.7757	8.06489	6.19206	8.18501	10.9223	9.93453	6.47166	6.09578	8.17989
GSM519314	9.4	0	cluster 1	8.1436	6.96922	8.30623	8.00715	9.9381	6.71832	8.20501	3.90821	2.77019	8.61046	9.31826	6.37074	9.00204	9.70301	6.45785	11.3946	11.3847	6.52376	9.09643	10.6135	6.66205	7.37961	3.4166	7.42996	11.2025	6.89872	8.87797	6.77746	11.1688	6.14491	3.17503	8.33537	9.85852	10.8476	9.55036	8.16967	10.7593	10.7174	7.73628	7.22529	8.3452	9.92756	10.363	5.51907	5.83299	7.77358
GSM519315	10.4	0	cluster 2	8.79139	7.11656	9.23949	3.9599	9.33461	8.87977	7.32443	3.12304	1.86479	4.53712	8.23567	8.53775	8.88416	9.8028	6.81338	11.1347	10.098	7.01735	8.6257	9.66345	6.86821	6.85084	3.54041	7.2552	12.358	6.72135	10.9924	6.61599	8.91731	6.14709	3.88789	6.96428	9.01929	9.20258	10.3987	8.30818	11.728	11.0961	5.52706	5.82568	8.3983	9.56382	10.0884	5.44987	6.74654	8.03637
GSM519316	11	0	cluster 1	8.70405	7.94159	8.46593	4.63767	10.4993	6.03779	8.31388	3.81147	5.23624	6.15713	8.46673	5.70204	9.90337	9.05125	6.81542	11.5349	11.2647	7.2377	8.34292	10.0787	6.53919	7.81204	3.82103	5.9675	10.3866	5.94856	9.13007	6.29585	9.45206	7.57595	3.62799	8.15781	10.4812	9.65398	10.0379	8.27552	10.963	10.5815	7.8835	6.20283	7.82739	9.63751	9.36382	5.97593	5.41056	6.83513
GSM519317	11.1	0	cluster 2	10.3234	7.72331	9.01085	5.78526	9.92188	5.34321	6.99407	4.33013	4.77521	6.22117	8.99702	5.52114	7.30714	10.1149	6.67923	11.4133	9.96154	7.25776	9.96114	9.8978	6.39995	7.16165	3.73516	11.4664	9.04894	5.79412	9.78586	6.80627	12.8014	6.46909	3.8207	8.12924	8.85799	10.2638	12.0504	8.25467	10.8936	9.86851	6.70262	6.60052	9.85907	10.1372	9.50678	5.71893	5.4384	8.32405
GSM519318	6	0	cluster 2	9.06412	7.64233	8.13082	4.68055	9.48086	4.63933	7.32471	3.48372	6.7679	5.50785	8.10331	7.01924	9.70635	10.4686	6.6887	12.2727	10.7101	6.70023	9.36867	11.3448	6.54568	6.64869	3.20789	7.17799	8.50358	6.76834	9.71693	5.58705	10.4798	5.79601	3.74139	8.95606	9.87539	9.29418	10.4743	8.12817	11.641	11.0321	5.4037	6.88285	9.27287	11.3751	9.40407	5.13992	6.4499	8.26854
GSM519319	9.7	0	cluster 1	9.73736	8.12922	8.17782	3.77371	9.54187	1.75812	7.81046	3.94727	2.35621	10.1906	8.74986	7.21587	10.2861	9.68919	5.83803	11.4695	10.4306	6.35099	9.59055	10.3503	6.90466	6.93817	3.22392	7.34495	9.9731	5.556	9.40718	6.3774	11.5444	5.97365	2.29918	8.51296	10.0423	9.27496	10.88	7.82166	11.385	11.0351	8.66871	7.52111	9.06424	10.3917	10.0651	6.92657	7.47671	7.25521
GSM519320	11	0	cluster 1	8.0893	8.63381	8.4817	5.08354	10.0106	5.45902	7.79058	3.45425	6.20905	3.67376	8.42821	6.276	8.81973	10.4558	7.78138	11.448	11.4751	6.14751	9.00116	10.5042	7.22704	8.09381	3.27334	6.44256	11.8208	6.59756	9.4675	7.76477	10.8796	7.15946	2.68511	8.39495	10.3843	9.72834	11.3895	8.34588	11.1297	10.4017	7.35589	7.4019	8.27911	10.8095	10.0122	5.26506	5.78131	7.67651
GSM519321	11.2	0	cluster 2	9.36814	7.48816	8.98816	4.21492	9.80139	5.89491	8.11793	3.01102	6.55404	8.27365	9.18882	6.95699	10.0484	10.6936	6.96637	11.8132	9.69025	6.48615	8.74172	10.0022	6.93835	6.3704	3.41345	11.5075	9.94449	7.67231	8.85785	6.8213	12.6482	6.37079	2.29181	8.49748	10.2444	10.1738	11.9534	8.51003	11.1312	10.5477	6.84586	7.25509	9.43041	10.7434	9.82417	6.09852	5.24	8.19899
GSM519322	3.4	1	cluster 1	8.09175	7.53003	7.91372	6.86654	9.30937	5.24811	8.98557	3.02828	3.16682	6.32097	8.94949	6.62234	8.70739	9.93302	7.28962	11.5104	11.343	8.22717	9.56835	10.3452	8.29092	7.66525	3.07233	11.4435	10.0034	7.32188	8.86158	7.75017	10.3555	6.7541	2.26124	7.36597	9.94498	10.9033	11.2042	9.09737	11.1663	9.28841	6.83584	7.27744	9.42481	11.5241	9.17628	7.12395	7.66859	7.02732
GSM519323	10.3	1	cluster 1	8.85724	7.83681	8.65948	4.4459	10.7283	7.02165	9.19178	2.02104	3.40264	6.0039	7.99595	6.75941	8.21577	9.67488	7.1037	11.3347	10.666	7.23771	8.43584	10.1908	6.56454	6.5816	4.20212	9.63074	9.18368	6.66884	9.65715	5.27987	10.7633	6.05424	4.12016	7.87816	9.18314	9.54311	9.56738	7.19887	11.2525	10.0798	8.27719	7.50586	9.30645	10.0914	9.44369	6.26515	4.77845	5.20829
GSM519324	4.7	1	cluster 2	8.67645	8.04158	10.5801	3.46595	8.12231	6.15615	7.44212	3.66391	1.39148	7.72535	8.0822	8.39331	9.07583	13.2617	11.1663	10.8866	11.0514	7.66778	10.4998	11.3148	6.82529	7.10224	3.77737	12.0842	10.8173	5.76862	9.45218	7.56386	8.5494	9.26882	6.13234	8.16624	10.1137	10.4311	10.4126	8.95471	10.7715	9.99057	5.85746	4.97663	8.88885	10.4883	10.0587	6.25925	5.86342	7.11787
GSM519325	11	0	cluster 2	6.68074	7.58087	8.75552	4.8201	9.12429	4.80327	8.63171	1.61545	4.59609	6.53135	8.72603	6.09319	8.74929	8.7041	6.32429	12.2207	11.1896	6.50592	9.13371	10.135	7.56537	7.21589	3.4947	10.3825	9.70796	7.01968	10.1725	7.26288	10.8961	7.77302	1.92823	7.69357	9.568	10.0445	10.7148	8.73988	11.1529	9.87664	6.99665	7.34353	9.64929	11.5262	9.24139	5.85355	5.52456	7.40596
GSM519326	11.2	0	cluster 1	8.8742	7.90905	7.89233	5.11911	9.41666	5.98746	8.27396	2.91094	1.95489	5.09515	8.96456	6.77127	7.39959	9.98738	7.27214	11.5692	10.1311	6.02627	10.3944	10.2533	6.79317	6.88091	3.50377	6.11401	9.69752	6.59684	8.87358	6.04949	11.1427	2.81069	2.33751	9.28918	8.99379	10.3034	10.0146	6.86628	10.6139	9.87461	8.5994	7.50156	9.09973	9.8682	9.65024	6.60358	5.30361	8.01041
GSM519327	6.2	1	cluster 1	10.678	7.24286	9.20366	4.68158	9.29826	6.76366	7.36199	3.10255	2.90521	3.76787	8.34757	6.3629	8.52156	10.1074	6.77979	10.5717	10.1124	6.18653	7.84715	11.329	6.6896	6.52926	4.29172	3.66737	9.20506	5.90828	9.34756	6.6684	11.128	5.4608	2.40827	8.8154	9.6763	9.20645	11.0882	7.98062	9.85572	10.7112	6.19637	6.21586	9.03843	10.5193	9.74015	6.60983	4.56939	8.32643
GSM519328	7	0	cluster 1	9.92259	6.91151	8.93094	3.82094	9.58713	5.22411	8.39872	3.52323	2.00172	7.47688	7.22346	5.29731	8.56328	9.90243	6.7729	10.9738	10.1717	7.13959	8.29411	10.6771	6.83475	6.89693	2.33783	8.98175	8.27262	6.74527	9.08412	6.8315	12.2075	5.55957	5.19469	9.558	10.5795	9.75385	11.9087	8.03823	11.3459	10.4072	6.09192	7.64934	8.97218	10.4613	8.98297	6.90398	7.28711	8.14566
GSM519329	9.1	0	cluster 2	9.04288	8.38093	8.21805	6.56708	11.1901	4.47618	7.2053	2.7043	6.15191	6.29916	8.42175	7.85338	7.51134	9.98545	7.37611	11.2292	10.2428	7.69176	9.10643	9.72522	7.63901	7.03415	3.84851	7.87536	9.60516	5.91047	8.47635	5.81889	11.947	4.08856	1.98151	8.88844	9.34199	9.1888	10.0148	6.97304	11.0042	10.152	6.76522	6.96931	9.84564	10.4291	9.81663	5.95001	4.49892	7.90997
GSM519330	10.2	0	cluster 1	8.57834	7.94159	8.63995	4.34468	9.31028	2.86252	7.28246	2.86073	3.0488	8.14522	8.42522	6.62103	9.12188	10.6079	6.82251	10.3917	10.8693	6.42859	9.26948	10.1236	6.04424	7.04202	3.30419	6.43365	10.2636	6.27377	9.0239	6.57454	10.5598	4.85085	3.05959	8.2738	9.12993	9.77234	9.67046	7.76435	11.2098	10.8152	7.04847	5.98731	8.3769	9.3455	9.99471	6.76348	7.19546	8.33295
GSM519331	11.1	0	cluster 1	8.67618	7.59241	8.68334	4.23441	10.2241	5.66719	8.76553	3.70867	5.60527	7.23499	7.77699	7.93753	8.26264	9.49579	6.81761	10.8603	10.3274	6.43899	8.80789	10.7545	6.56316	6.61058	4.53521	11.8929	9.7195	6.44056	7.55468	5.83293	12.0187	5.20416	2.94909	8.18101	9.01583	9.75213	9.59902	7.40494	11.4557	11.4981	6.98536	7.40227	8.78751	10.1652	9.71535	6.57194	5.26016	8.00916
GSM519332	11	0	cluster 2	10.0702	7.85918	8.93917	5.94507	10.2343	6.21068	7.78671	3.89646	7.40447	4.2177	8.80095	6.667	8.04583	11.0647	6.92542	11.1259	9.82111	7.18355	8.76245	10.6572	6.56013	6.72554	2.82585	5.72684	9.01968	5.13579	9.32962	6.23733	10.9093	6.42524	3.20195	8.62967	9.39915	8.54862	11.1197	9.07089	11.2565	10.0427	7.39388	7.64761	9.85995	10.4918	9.83741	5.40546	5.99304	7.61724
GSM519333	7.5	1	cluster 2	8.66555	8.03812	8.34147	4.10548	9.26545	5.17813	7.30609	3.52664	3.23766	6.21199	8.31175	6.91494	8.56516	12.3643	8.71023	10.9744	9.94937	6.05718	8.54155	9.24459	7.27111	6.53546	2.47801	7.02412	8.70383	7.01838	9.98093	6.00533	10.9126	5.80443	2.72356	7.93105	9.34852	9.87595	9.60492	7.99677	11.0384	11.2243	6.58396	7.80966	9.8967	10.1813	9.38452	6.40686	5.76316	9.73176
GSM519334	9.5	0	cluster 1	8.85038	7.83651	8.69532	5.18922	9.65419	4.58068	7.54114	5.6553	5.10628	7.70389	8.79363	6.36139	8.85635	9.54392	7.27148	11.112	9.09911	5.47459	8.89865	9.38035	7.03127	7.08032	3.96803	6.85087	8.95818	6.22451	9.97275	6.64519	11.9461	5.42868	2.54119	9.47407	8.99323	9.84969	11.0728	7.20612	9.7821	10.4083	5.15384	7.67787	8.68045	10.1876	9.11091	5.19304	4.29152	8.45168
GSM519335	11	0	cluster 1	8.57826	7.99263	9.53225	5.53578	9.53871	4.09302	8.04241	3.38281	5.22117	6.89973	8.10193	5.99306	9.17055	9.57605	5.10774	12.0954	10.917	7.47172	8.30327	9.92999	6.78515	7.81333	5.09213	7.74009	9.29996	5.98549	9.96871	6.87241	10.8186	5.96435	1.61208	8.83348	9.0857	9.08889	10.6214	8.00267	10.9783	10.3973	7.03923	7.41341	9.31464	9.78305	9.25258	6.37427	5.03748	7.23323
GSM519336	11	0	cluster 1	8.45373	5.55604	8.30978	5.67867	9.21331	2.38948	7.38947	4.44005	4.51893	7.04063	9.32709	7.183	8.06868	10.3141	7.08399	10.9837	10.7548	6.99253	8.77098	9.58384	7.72564	7.66955	2.50174	6.4499	9.51009	6.28217	9.69884	5.72387	8.77896	7.14437	5.70691	8.1791	9.08724	9.48728	10.0841	7.84803	10.4236	9.57925	7.2844	7.36043	8.87662	9.05218	9.48882	4.75114	4.94089	8.1295
GSM519337	2.7	1	cluster 2	8.9488	7.33447	8.50514	4.19016	9.03679	6.00452	7.95856	2.06194	6.65125	7.22621	7.66603	6.3794	7.46673	10.1814	7.24759	12.4654	10.6237	7.98892	8.78548	9.57617	6.44555	7.37709	4.19975	5.83379	9.33671	5.42704	8.7617	6.78626	10.7356	6.67003	3.79531	8.31557	8.75381	9.43314	11.2227	8.40104	11.9356	10.5995	5.55004	7.37864	9.61166	10.1003	9.25453	4.48685	5.09495	7.70335
GSM519338	10	0	cluster 1	9.29163	8.17468	8.64895	3.67146	10.1639	3.99081	8.01926	2.75668	3.15406	9.48179	9.2779	5.03902	7.8654	9.60245	6.1676	10.5623	12.217	6.34174	9.20456	9.78971	6.09091	8.107	4.99442	11.2465	11.6229	5.99392	8.76758	7.41543	10.1522	5.92515	3.29146	9.12587	9.86437	10.9181	11.581	8.56908	11.1625	9.86535	7.54683	6.70095	8.96398	10.3189	9.99148	7.99256	7.18514	6.76718
GSM519339	11	0	cluster 2	8.86205	5.87545	7.8933	5.19764	9.75334	5.35695	7.34766	6.05327	3.58234	10.2603	7.03395	6.60309	8.21972	10.5616	8.54361	10.2417	9.057	6.40767	9.73345	9.73205	7.71171	6.38035	3.8943	6.58353	8.018	6.09593	9.04461	7.12469	9.20522	4.23649	3.18169	7.95446	8.80198	9.21169	8.70697	7.04137	11.0479	10.6598	4.41153	7.51819	9.97291	8.6267	9.24055	5.89348	4.23095	8.77083
GSM519340	11	0	cluster 1	8.88712	6.59915	8.16274	4.89896	9.70248	3.39492	7.79812	3.36007	3.18377	7.28171	8.35248	7.33655	9.42449	9.75323	7.04895	10.8542	9.16391	6.38668	8.10818	11.0394	6.82983	7.00068	3.01381	4.88581	8.73551	5.09046	8.63722	6.11129	10.6758	3.81536	2.18868	7.96877	9.76116	9.25781	10.5856	7.63971	10.9357	9.34128	8.27642	7.44833	9.47585	9.69187	9.53099	3.66851	5.12808	8.32832
GSM519341	10.8	0	cluster 2	9.15221	7.28753	7.2708	4.69118	9.80446	6.41625	7.9393	2.91715	1.25719	4.96043	8.24354	8.87366	8.62371	9.79863	7.68322	11.389	10.66	6.17011	9.34652	10.7471	8.73551	6.42431	4.18356	6.32822	8.74555	7.40256	9.2562	6.00891	7.84938	7.74933	3.37807	7.20821	9.52217	9.86944	9.84886	9.02095	10.4877	10.2282	6.86509	7.54991	9.32436	11.9103	9.32188	4.70399	7.09084	8.29183
GSM519342	5.5	1	cluster 1	8.13646	7.76043	8.90994	4.37621	9.56255	2.26219	7.71166	2.87888	4.35925	5.81227	7.94641	6.99681	8.30388	10.3025	6.435	10.7071	10.1093	4.85963	7.97221	11.0938	6.39735	6.53802	4.00182	6.19972	8.88235	6.20248	9.40449	6.36731	11.5651	5.8639	3.74581	8.76213	9.49787	9.31818	10.3189	7.90414	11.4463	9.95486	7.40997	5.50565	8.90724	9.43939	9.67506	6.23	6.81922	7.9025
GSM519343	10	0	cluster 1	7.24596	7.91091	8.91486	6.94614	9.16754	2.29613	7.77046	2.04884	3.79575	5.70764	7.95865	6.31584	8.43706	10.2754	7.24231	10.3365	11.6789	6.02347	8.40445	10.1186	6.99935	8.26242	4.11963	5.13276	10.5874	6.32684	10.1065	7.3296	10.0739	7.21548	1.71404	8.4984	9.27175	10.2423	11.5921	8.63078	10.4359	9.63858	7.23813	7.36918	10.1835	9.9421	9.75583	5.6741	6.14579	8.08454
GSM519344	9.9	0	cluster 1	7.79717	7.47302	8.80327	4.88336	8.96184	5.89831	8.049	3.34695	3.14334	5.52297	8.31383	7.66788	8.416	9.31836	6.88163	10.9777	9.81894	7.14872	8.9206	10.2183	6.45819	6.91726	3.91405	6.29623	8.80631	6.96584	9.24905	5.98152	10.9399	5.78807	2.2734	8.82002	8.31961	9.19136	10.7498	8.45899	10.2181	9.25208	7.67601	7.51481	10.5209	11.2422	9.26605	5.81486	5.6091	8.18204
GSM519345	9.2	0	cluster 1	8.95618	6.13419	8.99302	5.32358	10.69	5.40627	7.23453	2.64598	5.52691	6.69463	9.07693	6.11178	8.34783	9.49412	5.04931	10.8794	11.0595	6.49429	8.80132	10.4588	7.67724	7.78869	4.42315	6.49086	10.9798	6.44605	9.24333	7.42969	10.8035	5.78985	2.88477	9.0862	9.68303	10.1292	10.8566	7.97932	11.6117	10.1931	8.1724	7.54424	9.73133	9.74295	10.635	7.04755	5.9954	7.30176
GSM519346	10.6	0	cluster 2	8.22918	6.36982	8.94904	5.65007	9.00525	5.77773	7.41716	3.7254	4.95675	6.67193	8.66753	7.44267	8.00725	11.6686	10.6495	12.3069	9.38878	9.04829	9.72268	10.5211	9.25364	6.26426	4.56799	11.0879	9.90855	7.63982	9.77781	6.72693	9.82783	5.61263	2.16784	7.61918	7.68208	8.22398	11.9226	8.15684	11.0121	10.8564	5.03501	6.90889	8.92943	10.8149	10.4409	4.52527	6.3785	9.32387
GSM519347	10.1	1	cluster 1	8.21108	7.99117	8.57006	7.11363	9.45581	3.3898	7.94935	2.63205	5.3252	6.07625	8.53665	5.62701	8.59916	9.06831	6.38173	12.5692	10.7474	6.70684	9.46365	9.82228	6.70671	7.25902	3.71576	6.09597	9.46137	7.09039	9.52354	7.32119	12.0644	8.32414	2.70177	8.76948	9.70195	9.92351	10.9781	8.85519	10.967	10.2493	7.40981	7.4588	9.63586	10.7621	9.11332	5.50479	6.36242	7.43971
GSM519348	10.5	0	cluster 2	7.87867	7.08981	9.15722	5.75917	9.24056	6.51141	8.79725	3.6169	5.13733	7.21424	8.68269	6.32141	9.48511	10.087	7.17575	11.716	10.1248	8.31284	9.10346	10.0928	6.87828	7.09374	4.10682	7.34847	8.93017	8.05691	8.63603	5.58549	10.9747	8.08811	2.97211	8.9303	10.0797	9.34085	10.607	9.01013	11.5397	9.42521	8.36502	6.49625	9.65372	11.779	8.77995	4.904	6.89591	7.51165
GSM519349	1.9	1	cluster 1	8.22248	7.17614	8.75025	6.06054	9.22331	6.37661	7.87506	2.03921	4.66731	4.84049	8.20688	7.71184	8.73427	9.68501	7.33134	11.6886	11.3503	6.18722	8.76641	10.1775	7.36337	8.11102	3.73867	6.8139	9.61868	6.32838	9.91983	7.22376	9.49598	7.47064	4.48728	9.11048	9.64957	9.95334	11.4735	8.68875	10.4391	10.5082	8.23795	7.33198	9.42204	10.4205	8.78446	5.51497	5.78213	7.95586
GSM519350	9.2	0	cluster 1	8.55932	8.18861	8.70313	6.40648	11.5079	5.54113	8.03237	2.33617	5.5515	4.98634	9.02962	6.50998	8.74883	9.99803	6.99092	11.9917	10.187	7.00382	8.68238	9.30285	7.09225	7.03023	4.84588	5.59109	9.21226	7.36359	10.0611	7.07813	11.449	6.38524	3.61069	9.2764	9.64304	9.66554	10.8748	7.98751	10.5191	10.8825	7.26597	7.33374	9.73845	11.0282	9.15245	4.32486	6.42693	7.83711
GSM519351	7.9	0	cluster 1	9.40937	5.69515	8.25167	4.41308	10.0204	6.37737	7.51899	3.6756	3.45677	4.48374	8.85068	6.4662	7.26288	9.13826	6.89276	10.6728	9.7749	8.28428	8.65088	10.1395	6.05763	7.21332	6.19088	7.43602	10.7149	5.41053	8.80756	6.97124	11.8831	4.51751	3.34695	8.16632	8.64801	8.76042	9.79086	6.99874	12.083	9.46924	9.48215	7.8338	8.77385	9.79922	9.72416	6.79199	7.23723	7.57522
GSM519352	8.1	1	cluster 1	8.47327	6.41611	7.83574	6.34653	8.92837	6.02289	7.85319	2.19656	3.60723	5.47278	9.50393	6.85211	10.0704	9.43055	7.16857	11.4675	11.2774	6.66423	9.57296	10.6559	6.98088	8.073	2.31669	9.41531	9.79239	7.25029	9.07234	6.40006	10.4712	8.92768	2.26898	8.73821	10.4316	10.127	11.5202	9.0534	10.9545	9.85129	7.20031	7.33283	8.59555	10.8846	9.28532	5.00385	5.19395	6.47434
GSM519353	7.5	0	cluster 2	10.3641	6.38115	7.8206	4.25108	9.63995	5.08108	7.33994	2.22915	3.03585	9.11666	8.08549	6.60427	7.19731	10.1816	7.98032	10.7079	9.0065	7.8045	8.91111	10.123	7.0497	6.26615	2.74567	5.77608	8.37439	6.27282	8.64373	5.68696	10.2556	4.94344	4.59682	9.23191	9.02722	7.15644	11.0388	7.57927	10.8816	9.53211	6.41578	7.41602	9.14342	9.57309	8.53423	6.77493	5.35312	7.94019
GSM519354	9.4	0	cluster 1	9.06929	8.23303	8.81635	4.89746	9.996	5.56156	8.69789	3.49118	5.03722	7.14191	8.62605	6.04846	8.40276	9.63189	6.44383	12.0336	9.77463	6.68414	8.88324	11.2264	6.58282	5.69504	3.24547	4.89591	8.69734	6.93614	8.99961	6.55279	10.4397	9.42553	4.57352	8.00828	8.77355	9.6213	11.4611	8.94388	11.3705	10.5204	7.80747	6.75862	8.47787	10.416	9.35165	5.87772	6.09872	6.57357
GSM519355	10.6	0	cluster 2	9.7399	8.32581	8.38708	4.87049	10.3493	5.42769	7.95907	5.92887	3.19043	6.31543	7.59811	7.08941	8.46475	9.26929	5.55418	11.3836	9.95296	7.47502	8.38903	9.55636	6.86599	7.23538	2.98834	5.08904	8.59044	7.18701	9.67937	5.50278	9.02487	5.94864	1.88122	8.72437	9.59996	9.27231	10.7314	8.38942	11.9549	10.7117	6.44635	7.40158	8.07587	10.6087	9.53733	6.15824	6.01148	8.34476
GSM519356	10.2	0	cluster 1	9.19783	7.67208	7.95159	5.79317	9.65397	6.35675	8.42274	3.04523	3.80826	5.64532	8.02133	5.73543	6.60478	10.2165	5.95181	10.0565	10.659	7.75139	10.1097	9.54373	7.6865	6.88211	2.75325	6.54918	10.3962	6.03402	8.85216	5.93069	7.62282	5.28904	5.22653	8.67379	8.62522	9.54455	9.02356	7.12253	11.1938	10.4578	7.70159	7.45831	8.69962	9.79658	10.0314	3.73718	6.22523	6.71943
GSM519357	5.3	1	cluster 1	8.37267	7.7995	9.17209	4.28085	9.27871	5.72758	8.13961	3.5959	2.12535	5.58563	8.70327	7.08964	10.3583	10.0303	7.4295	12.1137	11.1724	6.88964	9.48826	10.3225	6.98382	7.78214	3.4895	11.3917	9.20114	6.0276	9.98521	7.77188	10.8002	7.07807	3.17677	8.82185	10.026	10.1535	11.0501	8.64288	9.95352	10.2154	7.43399	6.63709	8.5021	10.1887	9.56377	5.36937	5.41811	7.86384
GSM519358	8.9	0	cluster 1	8.32892	8.30289	10.6874	4.40259	9.67172	5.45332	8.61933	3.9846	1.10665	7.64582	9.298	7.17978	10.0791	9.96288	6.76429	12.6377	11.3163	6.2138	9.2939	10.2779	5.89278	7.9785	3.424	8.26575	9.76623	8.07552	9.06117	6.78039	8.99156	8.53633	1.9296	8.85392	10.3194	10.4744	12.1591	9.64809	12.5497	10.6224	7.33307	7.25075	9.98286	10.7545	9.50203	6.11542	6.2156	7.9391
GSM519359	1.3	1	cluster 1	8.31184	7.14206	8.90036	4.10229	9.55429	7.0084	6.83388	9.28422	2.2956	5.75564	7.74526	6.07541	8.85243	9.65089	6.82951	11.0499	11.6078	6.4797	9.02451	10.6691	6.68099	7.38585	3.15034	6.23995	10.4459	5.37876	10.2807	7.38738	10.1289	7.14561	2.25656	9.45743	9.77388	10.4294	10.3806	8.32451	11.2772	10.2745	6.53592	5.80873	9.63502	10.5845	8.26396	7.43017	6.65606	7.85794
GSM519360	9	0	cluster 1	8.79634	5.93069	9.07168	5.44822	9.53648	6.3263	7.10715	3.37078	5.80394	6.01476	8.12324	6.7697	8.2355	10.0833	6.84342	11.8827	9.851	6.84172	8.28624	9.23114	6.85342	5.80659	3.9314	6.98524	8.76947	6.83488	9.44106	6.36365	10.9599	5.40582	1.92664	7.78574	8.87348	8.92134	10.5812	7.53263	11.8023	8.8133	5.78449	6.77884	9.99863	10.8269	9.14625	5.0742	5.03786	8.52004
GSM519361	8.4	0	cluster 1	9.46236	8.20886	8.84415	4.7544	8.606	6.47791	6.76444	2.80891	3.15941	9.78013	8.01461	5.84234	7.07915	9.50537	6.41979	10.6422	10.6048	5.97645	9.22237	10.3372	7.20903	7.11229	3.45941	6.05769	9.53504	6.48946	10.09	5.14095	11.3674	7.29207	3.0122	8.54348	8.83308	9.53995	10.0922	8.38641	10.9731	9.37588	7.01714	7.36739	10.3684	10.3737	10.1231	5.40995	5.9991	7.53595
GSM519362	9.1	0	cluster 2	9.4858	7.62313	8.27157	4.6718	9.02483	5.50862	7.23507	5.547	4.80538	5.71664	7.27002	7.47021	8.42366	9.90069	7.87893	9.46349	9.26879	10.6308	9.31391	9.60734	8.56735	7.03984	3.85959	6.3335	9.59096	5.78349	8.99229	7.10347	9.69139	5.70306	2.49286	8.13681	8.1176	8.76941	10.3242	8.4522	10.5186	10.7388	5.87316	7.38789	8.76484	9.48548	8.39217	6.51283	4.26599	8.37675
GSM519363	8.7	0	cluster 1	7.2636	8.27466	9.70635	7.3517	9.40812	5.62371	8.71732	2.11453	3.23026	8.16743	9.18118	6.40786	9.28543	9.83528	7.27917	11.7015	11.5109	6.5831	9.47466	9.91215	6.80142	8.12546	4.37415	8.81913	9.77695	7.13432	8.59733	7.0865	10.4721	8.37683	3.76346	9.17907	9.90158	10.0724	10.2936	8.73822	10.477	10.3377	8.06985	5.89131	8.48993	10.9384	9.18096	5.68255	7.14724	7.73343
GSM519364	10.3	0	cluster 1	8.42501	7.50259	8.44785	4.30312	9.69241	3.40168	7.74656	2.97413	3.15941	5.06536	8.60358	7.10186	7.71066	11.0154	6.52319	10.3124	11.4888	7.70658	8.8161	10.9709	7.34903	8.17238	2.78715	5.65175	10.2204	6.63803	9.57376	6.23161	11.1156	8.23702	2.45509	8.68421	9.93928	9.89064	10.8185	8.43581	10.6876	9.13059	6.82709	6.78561	7.90392	10.0806	9.60215	5.73358	4.3537	7.4807
GSM519365	9.6	0	cluster 1	7.84931	8.06785	8.54194	4.72743	9.86023	5.70579	7.81822	3.06316	2.24626	6.50529	8.92273	7.53706	7.93704	10.2602	6.4767	10.8553	11.8194	5.34408	9.0298	9.88008	6.95247	8.00334	2.52631	9.17065	10.2926	6.53168	9.35303	8.07667	11.898	6.61153	4.53189	8.83895	9.5078	10.1769	10.9271	8.32222	10.6609	9.5799	6.75958	7.45338	10.3439	10.1472	9.41602	5.94645	5.67932	7.22259
GSM519366	10.1	0	cluster 1	10.0457	7.63516	8.72929	4.51271	11.6917	5.56752	9.25962	1.97277	5.25628	6.51223	8.33236	7.08614	6.66029	9.94104	6.18019	11.7748	10.3432	6.3183	8.54645	10.9335	7.05614	7.33234	4.29383	5.15859	10.6784	6.89858	8.53294	6.58064	10.451	6.11887	5.68618	9.42811	9.69865	9.0189	11.1831	8.20271	10.5922	10.058	7.25976	7.06505	8.89514	10.6113	10.0286	5.57512	6.03463	6.64582
GSM519367	3.7	1	cluster 2	10.5915	7.39593	9.25965	6.01713	10.5269	6.47657	6.9236	8.16068	6.09391	5.25977	8.53115	7.99613	8.12727	10.2705	8.41566	11.7988	10.2429	8.93073	8.94889	10.4739	9.15837	6.43808	3.74069	9.08949	13.1008	5.28903	10.1867	6.42576	9.40163	7.13644	1.66205	7.8898	8.13466	8.29677	11.1263	8.48655	10.7026	10.3575	6.2735	6.25294	8.81466	9.83933	8.90341	6.8672	6.04833	7.1733
GSM519368	3.4	1	cluster 1	8.7179	7.75856	8.8748	4.54292	10.1187	6.06516	7.7118	2.84053	5.59835	6.02708	8.82602	6.8137	10.176	9.88315	7.36834	10.4684	11.5229	7.35197	8.96212	10.5063	6.9524	8.37773	3.0525	5.22045	10.0887	5.96484	9.97829	7.13313	9.34807	6.77031	1.60298	9.05621	10.7818	10.1151	10.8318	8.59625	10.5982	10.0465	7.38642	7.53599	9.29521	9.62573	10.0687	8.05308	7.27469	7.8377
GSM519369	10.4	0	cluster 2	9.10099	7.36112	8.67495	6.89512	9.50795	5.76765	8.70996	3.1755	2.27487	6.89264	8.28888	6.47797	7.27028	7.99532	5.91975	11.6313	9.99501	6.03519	8.97198	9.36421	6.5759	6.83497	3.56371	5.65448	8.61014	8.07238	8.03656	6.62478	9.32393	6.0122	2.33183	8.89136	9.32334	9.49703	10.0705	8.42805	10.0915	10.6556	7.40047	6.71415	8.87434	11.1412	9.7961	6.15884	4.45039	8.75037
GSM519370	5	1	cluster 1	8.46963	7.42458	10.1025	5.96176	9.3579	6.23786	7.38136	3.16352	1.98962	9.53583	8.32733	6.62468	9.25151	9.83307	7.13258	9.73914	11.6464	6.6478	8.58989	8.1515	5.34348	7.44274	4.30223	5.91602	12.1705	6.12058	9.08584	6.40476	9.68508	5.5606	2.0547	8.19491	9.95342	10.3197	10.357	8.57821	11.894	10.2991	7.33332	7.52707	7.83956	10.4169	9.43989	6.50614	9.88043	7.82795
GSM519371	7.5	1	cluster 1	8.67103	7.28465	8.61152	4.55802	10.0979	5.82658	7.29968	5.6875	5.62575	4.55693	9.08837	7.13122	8.16935	11.1159	6.35749	8.99125	10.1314	6.09495	8.75196	11.0227	7.87427	6.56349	2.82117	6.0416	9.75891	6.41357	10.0139	6.68975	10.3266	5.51917	1.48569	8.5027	9.47408	9.43595	10.5963	7.4144	10.6774	10.4382	9.57092	7.39625	9.77815	10.1864	10.3951	7.75117	6.6446	7.43935
GSM519372	10.1	0	cluster 1	8.88721	7.43215	8.10306	7.03284	9.39139	4.52898	7.87743	3.1338	4.355	6.73319	8.57049	6.07305	8.02603	10.0225	6.74133	10.7108	10.3333	6.42927	8.84582	9.49077	6.59962	8.66848	3.39528	8.00112	9.27747	6.56572	9.09002	7.56991	10.519	7.27529	2.21203	8.61499	9.23845	9.72476	10.93	8.61341	10.8938	9.73134	7.67301	7.58812	9.38639	11.0612	9.6138	5.48043	5.17254	7.80185
GSM519373	7.2	0	cluster 2	9.88322	5.71303	8.36881	4.79577	9.56716	5.14	7.75717	2.96368	5.19514	10.5783	9.24656	8.07978	8.36194	10.7269	7.48658	11.5862	10.3337	7.03778	8.9429	9.57092	7.76473	6.33407	3.94637	7.57031	9.70561	5.86464	8.63283	6.8012	13.5625	5.47307	2.65747	9.36915	9.47933	9.50416	10.4175	8.29807	11.512	10.9245	7.19571	7.29483	10.3312	10.6696	9.21174	6.36748	6.27369	8.25252
GSM519374	10.1	0	cluster 1	8.978	6.82833	7.99806	4.6834	9.69022	5.49938	7.74326	3.15013	6.04913	5.26929	7.975	6.66771	8.85285	9.70155	7.72169	11.0811	8.77388	7.13706	8.23151	10.6616	6.2591	6.66587	3.02555	10.5495	7.87993	6.6675	9.82481	5.95556	9.57927	5.13912	1.94086	8.45662	8.9758	8.91959	9.03453	7.71581	11.2243	10.5944	7.80833	7.43868	8.91045	9.90019	9.73276	6.22102	6.07884	8.40418
GSM519375	8.9	0	cluster 2	9.11212	7.72738	8.18628	4.72253	10.0223	6.72516	8.12179	3.06391	2.56531	6.77453	8.33992	8.13936	9.09625	10.3777	6.26967	11.437	10.0699	7.13182	8.99777	10.0632	7.37646	6.79167	2.99205	11.3618	9.36083	6.95745	9.27738	6.16156	12.2399	7.1933	2.08336	8.70058	9.39675	10.1907	11.6897	8.48159	10.8024	10.6191	7.27849	6.19475	9.55105	10.845	9.52748	5.78455	5.60656	9.0842
GSM519376	9.4	0	cluster 2	9.39351	7.14832	8.56464	5.22688	9.55556	5.98444	6.75946	3.57411	4.74197	5.42613	8.96654	7.64023	6.1203	9.971	7.40722	11.0002	10.0241	6.67057	7.37228	10.1301	6.14344	6.60235	3.45702	5.16595	8.42643	6.59025	8.99138	6.48191	10.765	5.51498	2.14522	8.21726	8.88184	9.19925	10.3977	6.80565	11.3715	10.5433	8.20219	6.95422	8.75787	10.248	9.49335	7.25975	6.36773	8.25802
GSM519377	10.2	0	cluster 1	8.59541	7.8651	8.11069	4.9953	9.47736	6.60679	8.05762	3.14028	3.02318	10.2713	8.0779	7.34162	9.24847	10.4572	7.78096	11.4716	10.0292	7.07397	8.75324	9.57933	6.63951	7.02216	4.0753	5.80283	10.4302	6.77721	8.84985	6.5293	10.0522	6.72899	2.53691	8.59935	9.67263	9.02881	11.4164	8.62049	13.0774	8.96377	6.51154	7.48677	9.56034	10.9079	9.19757	6.37143	3.81982	7.47602
GSM519378	9.4	0	cluster 1	9.15973	7.09762	8.26	5.56461	10.1264	6.54008	6.38515	4.41199	2.96739	5.07689	8.04919	5.468	7.0573	10.1788	6.43114	9.37269	9.25859	5.70608	7.47102	9.69444	5.82602	6.53868	1.38511	3.95599	9.36872	5.70794	8.97971	5.54056	6.4142	3.68501	2.29484	8.85833	9.42432	7.889	10.2844	6.88837	10.882	9.33284	7.99679	7.03994	9.11912	9.24951	9.38878	4.37563	4.82747	8.30472
GSM519379	9.2	0	cluster 1	8.06854	8.3775	8.38247	4.62784	10.1934	6.33168	7.28711	3.5917	5.45887	5.02039	8.48297	7.99812	7.49928	10.4988	6.03996	10.1305	10.2207	7.22855	8.7897	9.37909	6.44289	7.24682	3.62063	6.01683	9.00085	5.82407	8.94771	6.87848	10.7334	6.51456	1.54053	8.54193	9.51702	10.002	10.8323	7.35823	10.7031	10.5086	8.96604	7.2723	8.40113	9.70728	8.9015	6.13372	4.8313	7.07022
GSM519380	9.2	0	cluster 2	8.77585	7.87328	8.584	4.20501	9.26605	5.91814	8.61235	2.24932	4.28006	7.86827	8.08018	7.17437	8.08535	10.3532	7.8472	12.4041	12.3024	8.50318	9.97412	9.29379	9.61256	7.20097	4.3906	9.32328	10.9786	8.15973	9.52067	6.3874	10.0904	6.54416	1.7898	8.11563	9.44432	9.2477	11.4404	8.87381	10.597	11.1094	7.33766	6.83128	9.89113	11.1372	10.1706	4.60595	5.20585	8.56906
GSM519381	9.9	0	cluster 2	7.09932	7.48306	9.28524	4.72961	10.5349	4.20482	8.2456	4.69606	5.74189	5.38433	8.89184	7.44995	9.77323	10.7404	7.669	10.3536	11.0719	6.2252	10.2389	9.8766	8.36876	7.57844	3.48892	8.06231	11.2422	6.95957	9.67639	6.94801	12.0853	6.14818	4.85153	9.38437	10.4182	9.93277	11.5179	8.56272	11.3418	10.9046	7.25769	6.40223	10.3978	11.9517	9.93987	4.95741	5.9085	7.53261
GSM519382	3.1	1	cluster 1	8.91339	6.35373	9.27844	4.1666	9.72628	6.0347	8.33141	2.53338	5.63168	8.19231	8.20212	7.1338	11.4836	9.85614	7.39001	11.1933	11.6404	6.83945	9.81548	10.5051	7.21449	7.96829	4.00548	7.55536	11.0938	6.21381	9.18383	7.54814	10.0989	6.87763	1.76493	8.84807	10.5129	10.3189	11.9923	8.73462	10.5783	10.1969	7.07905	5.93265	9.50222	9.92794	8.92821	5.60568	6.08028	7.53564
GSM519383	9.8	0	cluster 1	8.9321	5.89578	8.59616	4.63302	9.97873	2.71064	7.31061	2.00517	4.74901	8.78283	8.4515	7.51892	9.21364	10.563	6.05563	10.7573	10.8701	7.32149	9.52041	9.95081	6.52415	6.82853	3.55806	6.96192	9.66136	6.79724	9.22612	5.97401	9.88459	6.35429	2.97289	8.34381	9.85928	9.84074	9.47491	7.66959	11.188	10.6182	7.65423	7.66605	8.93474	9.41072	9.89435	5.93027	7.63765	7.50361
GSM519384	8.3	0	cluster 2	8.54304	8.07976	8.62182	4.70718	9.57061	6.52561	8.86852	5.44596	3.66516	5.22821	9.00414	7.34228	9.13045	9.17803	9.87766	12.0731	11.366	6.46169	9.53326	10.421	7.77959	6.98236	2.9184	11.0283	9.81752	8.40806	8.69919	7.43427	10.5484	7.98298	5.48648	8.17556	9.82291	10.9528	11.2891	10.1007	10.957	11.418	7.39993	7.68815	9.55536	12.196	10.5172	6.71682	7.31023	8.88753
GSM519385	9.8	0	cluster 1	6.81872	7.55592	8.9942	4.99015	9.17988	3.19108	8.59237	3.55194	5.84028	4.90961	9.06916	7.97961	9.42439	10.1895	4.08459	11.4995	11.0301	7.83955	9.68729	9.81997	6.87015	7.11359	3.49328	6.43144	9.6335	7.13798	10.8856	5.87664	9.70892	7.14763	3.85836	9.07415	10.098	9.96233	11.0527	9.04613	11.0058	10.0479	8.19367	7.50196	9.43269	11.016	9.53466	5.20516	5.87804	8.03738
GSM519386	10.4	0	cluster 2	9.44045	7.29148	8.7294	4.34902	9.86216	5.88523	6.41254	6.13384	6.55931	4.29725	7.38817	6.39652	7.53976	10.4253	8.26303	11.5008	10.2794	8.48709	8.8356	10.2464	6.90173	6.74295	3.49321	8.25564	9.13573	5.39649	9.75176	6.46602	11.5314	5.23939	5.01153	8.91121	9.13999	8.97629	10.511	6.24682	10.6897	11.068	7.27342	7.18019	9.15567	10.7583	9.34475	6.88969	5.11208	8.90835
GSM519387	8.9	0	cluster 2	8.42036	7.96455	8.67464	4.53938	9.61133	6.54686	8.6576	4.37972	3.32168	6.50048	8.97773	6.35657	8.62631	9.65886	3.84731	12.2034	10.6515	7.29355	9.16971	9.65523	7.2183	6.97648	2.3097	7.00339	9.52572	6.39033	9.62499	5.94838	9.82261	8.46634	2.59163	9.1594	9.567	9.78551	11.6691	8.85705	10.6307	10.0095	6.37825	7.80866	9.01498	11.3782	9.12237	6.51154	4.9563	8.15418
GSM519388	9.5	0	cluster 2	8.27012	5.48554	7.97925	4.95556	9.64492	5.94885	8.59064	2.23174	5.39065	6.12813	9.23597	6.13858	8.07009	8.8457	5.37956	11.3259	11.0257	8.73089	9.76792	9.99429	6.81459	7.35903	4.10203	7.49836	10.2159	7.52166	9.34293	5.77216	10.3121	7.84519	4.42575	8.97511	10.0172	10.7989	11.3999	9.11348	10.5879	9.86445	8.03678	5.9305	9.11045	10.5367	10.1972	6.46433	5.92632	8.03681
GSM519389	9.5	0	cluster 2	6.99863	6.9052	9.63473	4.29724	9.63231	6.28723	10.093	6.16466	5.6353	5.34418	8.27623	6.65546	7.12315	10.0607	6.91729	11.5262	9.78581	9.98778	9.60353	9.48864	7.38617	7.11451	3.77335	8.46524	9.55716	7.90837	9.81854	6.08549	8.07153	5.7638	1.8676	8.2702	8.58471	9.30394	10.3656	8.63605	10.8516	10.0828	7.29212	6.94442	8.2153	8.9461	9.2283	5.28752	5.12097	8.15983
GSM519390	9.6	0	cluster 1	7.88578	7.7754	9.21334	4.84638	9.03534	5.92712	7.50867	5.08652	4.40314	5.87571	8.16698	7.44112	7.32612	10.2832	7.95011	10.392	10.8719	7.68255	9.56114	9.30783	6.55631	7.75502	3.77261	5.16634	9.27428	6.54333	8.89292	7.24575	9.89048	4.01326	3.20103	9.58013	9.42687	10.2622	10.1504	7.38489	11.2637	10.8293	7.74233	7.27694	8.70008	9.01665	8.47422	5.90267	6.22222	7.36387
GSM519391	9.6	0	cluster 1	9.02412	8.24455	9.16299	4.73006	9.83723	5.25315	7.89042	2.93529	5.25035	7.39723	8.07093	6.90302	9.56778	9.60371	6.93204	12.2162	11.1905	6.28259	8.81699	10.2575	6.29574	7.41359	4.06893	7.10356	10.2615	5.53518	9.4217	7.09885	12.4713	6.88544	1.9426	9.10102	10.3042	10.1065	10.343	8.41905	11.1625	10.2201	6.38914	5.7597	9.63632	10.0151	8.88281	4.53733	5.29222	7.70391
GSM519392	8.3	0	cluster 1	6.76322	8.09473	9.27494	5.10511	9.8129	6.96792	8.40191	2.07199	2.51143	7.18861	8.86078	6.67262	8.84346	10.1981	5.57708	10.3687	12.3709	6.7178	9.17065	11.6267	6.39408	8.3929	3.22162	6.96393	11.2083	7.12354	8.99195	7.07384	10.1727	8.1312	1.76166	8.92092	10.6423	10.6013	11.3312	9.36026	11.004	10.0391	7.86999	6.28454	9.44614	10.4945	8.77416	3.70177	7.04268	7.04603
GSM519393	9.4	0	cluster 2	8.27318	7.75854	8.23877	4.55487	9.19757	5.26912	8.82412	3.836	5.98842	6.36739	8.97403	6.89091	8.00717	9.20806	5.20628	12.0913	10.7714	6.59418	9.9283	10.0373	6.66054	6.92569	2.40932	8.59479	8.79201	8.01669	9.80484	6.52102	9.41304	8.1361	4.66221	9.56255	10.01	10.2662	11.0238	8.92705	10.5903	9.39574	7.80011	7.06187	9.16054	11.4089	8.83321	6.21017	6.63027	8.03131
GSM519394	9.4	0	cluster 1	7.65847	7.66888	8.46496	4.28628	8.99102	4.62702	8.80106	5.76373	4.74504	10.0291	8.75744	6.41616	8.31011	9.59203	6.80144	12.0429	10.2534	6.02688	8.69535	9.42687	6.84961	7.33884	3.41345	6.8236	10.0538	6.95975	9.07678	5.74371	10.4289	6.52524	2.10639	7.92806	9.58996	9.26714	10.7865	8.34943	10.9089	10.0764	7.97942	5.18482	9.12785	10.7439	8.57667	6.11145	4.35533	7.37862
GSM519395	8.6	0	cluster 1	9.55086	7.46115	7.96104	6.04143	10.0039	4.98582	7.7205	2.89413	2.56826	9.60501	9.35044	7.83002	8.0448	10.4758	7.29792	10.5165	11.1763	6.16906	9.50709	10.8146	6.61969	7.3831	2.19085	7.03536	10.6162	5.80039	8.99199	6.3563	11.1698	6.1102	2.09851	8.64644	9.6423	10.2223	11.1193	8.5931	10.9429	10.3995	6.99391	7.34045	8.75754	8.93424	9.90267	6.69933	7.3928	6.86844
GSM519396	6.6	1	cluster 1	9.4261	8.34508	8.52459	4.57236	9.58226	6.56667	7.72855	3.56772	2.76751	6.67617	8.99341	6.10404	9.11778	10.803	7.54317	11.0234	10.8266	6.21091	8.95058	9.97675	6.71986	7.15652	3.36448	9.19615	10.4723	5.95929	9.3905	7.06456	12.5606	7.3357	3.26539	8.87036	10.5627	10.086	10.1718	7.43504	11.8652	10.4271	7.09248	5.69617	9.95139	10.081	8.98237	4.49721	6.38425	8.41714
GSM519397	9.3	0	cluster 1	8.96232	8.08122	8.81155	4.6367	10.3094	6.31146	8.0565	3.45034	5.41393	7.0341	8.86503	5.46654	10.1855	9.7898	7.08349	11.2576	11.1232	6.6683	9.67599	11.3361	7.98744	7.64886	3.86804	7.46748	10.6536	6.68164	9.27249	6.04609	10.5105	6.83647	2.83666	8.6213	11.336	10.1194	10.2584	8.65168	11.2834	10.3086	7.83292	5.69816	8.79604	10.0718	9.47531	6.20959	5.57072	6.01741
GSM519398	7	1	cluster 2	7.57043	6.78566	8.38037	4.81443	9.51967	6.13987	8.60047	2.28509	4.66635	5.8041	8.03299	7.03887	8.45193	10.577	9.34168	11.5012	10.9451	6.7205	8.89042	10.1311	7.1866	6.9879	3.447	6.22871	9.92021	7.35699	9.81068	6.57613	10.2078	5.75491	2.02123	8.30737	10.005	10.4758	11.8909	8.75951	10.5506	9.8232	7.41264	7.55255	10.2714	10.5065	9.80839	6.63129	5.01793	6.40566
GSM519399	9.1	0	cluster 2	10.0837	8.21181	8.06486	5.63971	9.25218	4.73123	8.51817	3.9719	3.25308	5.10176	8.76621	6.39647	7.79899	9.16121	6.64576	11.4354	10.62	5.49626	9.45385	9.64826	7.20931	6.80954	3.69747	6.84478	9.33878	7.70342	9.48519	10.162	14.0767	7.7302	1.8326	7.54984	9.42303	9.98091	11.4528	8.40715	10.9247	9.8514	8.0463	6.78242	12.6777	11.1288	9.19101	6.23371	6.42768	7.06296
GSM519400	3.3	1	cluster 2	9.03043	6.99891	8.16522	5.20808	9.42041	4.89136	6.94615	3.6828	4.18802	8.01173	8.4615	6.38842	7.63861	9.5419	6.00347	11.0042	10.378	7.13939	8.81558	9.51009	7.68174	6.98395	3.45032	7.21949	8.74908	6.61559	10.1528	5.06145	9.79864	5.61681	3.97989	7.59855	9.58906	9.07817	10.246	7.89706	10.4511	9.56369	6.43535	7.14728	8.54461	10.2293	8.30912	5.39888	4.71441	7.48887
GSM519401	9	0	cluster 1	8.15423	7.68595	9.19653	4.75543	9.71203	6.0776	8.19551	2.53302	4.60738	5.93016	9.59282	6.47391	9.06013	10.5117	6.95432	11.8279	10.7624	8.67907	9.24955	10.0729	8.22011	6.87229	4.51916	7.12963	9.91399	6.518	8.58105	6.81722	11.3167	6.80241	2.98052	8.76579	9.77192	9.67748	11.2601	8.53889	11.4348	10.0721	6.93882	7.353	9.69836	10.5431	9.08037	4.74103	6.79584	8.66029
GSM519402	8.1	0	cluster 1	9.33139	8.36765	8.61494	5.27108	10.5423	6.63045	7.67015	2.8494	4.94627	4.8164	7.90335	5.87784	11.1541	10.6038	7.0231	10.81	11.3835	6.86725	8.50262	11.2487	7.37263	5.90523	4.34479	5.86111	9.69044	6.93124	8.33883	6.70923	11.1795	7.92787	1.64095	9.28009	11.3349	10.1346	10.8178	7.90064	10.7945	10.1568	7.386	6.53479	9.12101	10.8788	9.4745	5.38671	6.56058	7.73359
GSM519403	0.4	1	cluster 1	8.42859	7.68648	9.08228	5.07881	10.3381	5.77252	8.01097	2.47639	3.56772	4.15437	8.22567	5.42186	7.24748	9.5711	6.50014	11.72	10.8692	6.22508	8.55836	10.6045	6.96151	7.3348	3.48165	6.29568	9.7964	7.28094	9.69124	5.69988	9.81672	6.48462	2.04048	8.39567	9.91362	9.68348	10.7386	7.79859	10.9598	10.2663	7.00439	5.45135	9.04084	9.82744	9.8907	4.88444	5.61102	7.12546
GSM519404	9.1	0	cluster 1	10.6838	7.38573	8.96523	4.70068	9.34144	5.75951	8.45639	3.99946	7.55215	9.9552	8.68237	6.69886	8.83669	10.0831	6.64979	10.1464	11.2907	7.48016	9.36966	10.3002	7.87	6.97583	2.88216	10.0332	10.121	7.32532	8.95911	7.54092	11.0859	6.7916	2.11407	9.68589	10.8244	11.0937	11.4044	8.40511	10.9744	10.1572	7.60383	6.65198	10.7529	10.571	9.54529	6.30819	6.48891	6.80544
GSM519405	8.9	0	cluster 2	8.62449	7.71735	9.75295	5.08694	9.38448	2.38317	9.29785	3.33983	2.62107	7.63496	8.5472	6.70062	9.01498	11.6788	7.83781	11.9062	11.3422	6.84521	9.07271	10.7463	7.5057	6.37738	3.85622	5.79981	9.86085	6.62606	9.66141	6.02166	10.1423	8.28529	2.33654	8.50421	10.3191	9.50078	10.7866	8.71571	11.422	10.4532	7.61254	6.8013	9.97274	11.0409	9.81238	5.55843	5.58694	7.27905
GSM519406	8.9	0	cluster 1	7.32733	7.79891	9.74573	5.00097	9.41151	6.2233	7.55475	2.36889	5.46847	5.29831	8.1778	7.52571	9.37904	10.1862	6.90598	11.8523	11.6161	6.62852	9.04254	9.8507	7.59443	8.38748	3.90397	5.481	9.97067	6.32922	9.028	6.88026	9.96194	6.98465	1.9758	8.47264	10.4745	9.98362	11.2976	8.01844	10.5081	9.35804	7.83491	7.18608	7.8024	9.71827	8.87073	5.96566	7.71567	6.26217
GSM519407	8.2	0	cluster 1	9.09711	7.89574	9.26829	4.25066	10.4784	4.09531	7.64933	3.7109	6.98193	9.26321	7.91173	6.84163	10.1739	10.0056	6.51545	11.2537	11.5076	6.6189	10.7825	11.365	6.14971	7.59283	2.57117	6.79361	10.8849	6.55498	9.0703	6.90223	8.86414	9.08455	1.65563	9.192	11.1922	10.1511	10.3596	9.07319	11.1001	10.2766	7.17935	5.54518	8.88899	9.98586	9.45072	6.42857	7.50454	8.16505
GSM519408	7.7	0	cluster 1	9.12867	7.06506	8.0196	5.10811	9.85917	3.42769	7.70855	3.10317	5.08678	8.41634	9.42715	6.56672	7.73705	10.3391	7.24034	11.3535	10.13	6.15886	9.42056	9.90036	6.76964	6.89178	3.79327	5.64834	9.2455	7.52657	9.33308	5.70474	6.14042	4.11446	1.91976	8.34088	9.37203	9.40858	9.39982	7.18538	10.9284	10.8415	6.22033	7.70947	8.61339	9.55816	8.94816	5.72866	4.59341	7.1263
GSM519409	8.7	0	cluster 1	8.84093	7.43247	8.30673	5.81906	10.113	5.99045	8.58995	2.85437	4.12507	7.20668	8.4253	6.68109	10.8942	9.51697	7.72155	11.4399	11.905	6.33157	8.81647	10.7034	7.87349	7.93441	4.48203	8.62351	11.4827	7.26142	9.27997	7.20081	11.0268	8.22758	2.91308	8.71593	11.2783	10.1159	11.4837	8.69424	10.5747	10.1351	3.92183	7.34984	8.44126	9.65626	9.32912	5.84825	7.83757	6.39604
GSM519410	8.1	0	cluster 2	8.73437	6.69645	8.52227	8.60482	10.2326	5.44922	8.123	3.42245	4.75448	5.78875	7.95135	6.36519	8.30581	9.98367	6.4827	12.3597	9.14835	7.82816	8.9219	9.93278	6.43077	6.42079	2.70104	5.18231	8.42183	6.87057	8.63667	6.97801	10.883	4.8314	2.76566	8.2628	9.52563	8.67498	9.51173	8.12245	11.1603	10.0477	9.14404	5.56135	9.82228	11.8366	9.54536	6.78231	4.27829	9.79847
GSM519411	8.6	0	cluster 1	9.82428	7.62329	9.16768	4.83954	9.74918	5.70402	8.54248	3.86412	5.12482	4.44981	8.76613	6.78071	10.3312	9.39488	6.46758	11.4518	11.5267	6.14231	9.67883	10.6766	6.86715	7.50292	3.5067	7.12054	9.79922	7.92339	8.25186	6.87136	11.9042	7.38842	2.28704	9.6349	11.2266	9.95066	10.2838	8.64452	11.0736	10.5361	8.24748	7.14577	9.31053	10.9316	10.0704	5.68795	7.27047	7.32307
GSM519412	9	0	cluster 1	9.47292	7.46738	8.62594	4.47001	9.14176	5.04604	7.99448	3.70352	4.07999	11.3089	9.14207	8.02066	9.21975	10.4268	7.20697	11.8747	11.9674	9.30673	8.56642	10.1125	7.18901	8.4657	3.99254	8.2785	10.7679	6.54549	10.1533	7.47943	9.94572	7.86328	1.99753	8.67507	11.1163	10.8588	10.6439	7.85178	11.4139	10.5833	7.17756	7.66747	10.6501	9.72124	9.00625	5.7973	6.58662	7.70316
GSM519413	7.8	0	cluster 1	6.97091	8.05824	8.66806	4.17132	9.73985	4.7023	7.90665	5.76328	2.13727	9.61428	8.85537	6.7302	9.49537	9.82463	7.61526	11.0289	11.588	6.28679	9.44028	9.73984	6.73446	7.86757	2.91234	7.62004	11.1165	4.83606	9.23517	6.84138	10.4894	7.77058	1.93361	9.5384	9.986	10.9711	11.2222	8.53674	11.4036	10.2609	8.01407	5.90751	10.4095	10.0328	9.51242	6.83884	5.46474	5.89734
GSM519414	8.7	0	cluster 1	8.88847	7.87392	9.34323	9.53385	9.45523	5.67982	7.65302	3.51043	3.17797	6.63214	9.24843	8.15787	9.45235	9.99517	7.47255	10.6639	12.1852	7.14281	9.19673	11.1869	6.78463	7.52258	4.24985	9.05941	10.5683	6.08189	9.24256	7.59822	11.7518	6.46418	4.11245	8.19737	10.5055	10.5033	11.3194	8.95149	11.1908	11.0712	7.54936	6.83714	10.5621	10.1549	9.99785	6.36443	7.15802	7.30152
GSM519415	8.4	0	cluster 1	9.29001	7.75473	8.62552	4.26938	10.062	4.81969	7.99596	3.73776	2.57146	8.51897	8.91027	7.61431	11.4872	9.60066	6.4984	11.5714	11.9398	6.18395	8.94111	11.2218	6.85546	8.15552	2.53624	5.37936	9.50656	6.63174	9.51908	6.85186	9.8282	7.97779	1.95489	9.09802	11.6818	10.1764	11.6633	7.93058	10.1755	10.1038	7.23412	7.694	8.74251	9.48168	9.01548	5.64223	6.99782	7.02649
GSM519416	8.3	0	cluster 2	6.85791	8.12796	9.03687	5.65361	9.49874	3.94578	9.26207	2.99565	3.48061	6.64332	8.7728	6.03109	8.71443	11.6537	9.22552	11.7977	11.555	6.52342	9.70567	10.5809	6.93314	7.49371	3.83779	11.0862	9.81997	7.49379	8.78599	6.61237	9.02635	8.98778	2.28509	9.17042	10.4353	9.98481	11.2444	9.2552	10.2834	9.69385	6.72309	7.45869	8.55598	11.2689	8.97343	6.29019	7.17927	7.10777
GSM519417	2.4	1	cluster 2	10.1786	7.87771	9.24236	4.62188	9.40642	5.96082	8.90869	2.02596	3.19197	8.68473	8.46463	5.34792	8.9323	11.2217	8.52819	10.8031	10.4371	7.46597	10.5354	10.6305	6.21121	7.16251	3.60853	10.6505	9.14897	6.65386	10.5885	9.80494	11.7514	7.90673	1.70837	8.63393	10.4376	10.1249	11.389	7.84855	11.9166	10.4506	4.24985	6.74283	11.2551	10.8228	10.2144	7.2853	6.9904	7.56434
GSM519418	8.5	0	cluster 2	8.19496	7.60393	9.26745	5.3561	9.49501	5.72642	9.11982	4.85633	2.8192	7.15157	8.6333	6.69025	8.73682	11.2135	6.18428	12.4157	10.3715	7.31454	9.06141	9.13636	6.23708	7.03295	2.97086	5.07391	9.43437	7.71947	9.44063	6.03208	10.8116	8.87015	1.67417	8.92889	10.2307	10.2907	10.5756	8.71316	11.0154	10.6118	7.49498	7.12021	9.4689	11.3539	8.61269	6.23377	6.63042	8.12128
GSM519419	2.9	1	cluster 2	9.23467	7.60847	8.55293	4.68223	10.1192	5.84082	7.99739	3.54666	7.1938	6.43971	8.04154	6.5931	10.836	11.0773	6.67336	13.1867	10.8211	6.68959	8.54992	12.7029	7.94032	7.53388	4.05176	4.98736	10.201	7.19999	9.2207	6.7665	11.8765	7.18148	5.73326	8.9326	11.1231	10.2223	10.798	7.96476	10.869	10.9948	4.41128	6.96981	8.72338	9.97142	8.73805	5.31186	6.57856	6.91033
GSM519420	8.1	0	cluster 2	9.60578	7.1843	8.11921	5.16091	8.92635	2.14053	7.30697	2.58453	4.90804	10.7821	8.32323	7.90345	8.83473	10.2393	7.93476	9.36374	9.9873	7.15987	10.1106	8.77261	6.52326	6.83113	2.89148	6.82332	9.12694	6.34605	10.0405	6.31162	8.87223	6.08261	1.8326	8.4707	9.48688	9.58145	12.3747	7.34968	10.5204	10.3183	6.64107	7.02897	9.06205	10.6634	9.03876	6.71825	6.57705	7.38499
GSM519421	8.1	0	cluster 1	6.88146	7.03824	8.18018	6.00712	9.62762	5.68487	8.2036	3.04257	5.69388	9.23832	8.86515	6.4419	8.46614	10.2495	6.56804	10.576	11.1262	9.11973	9.61621	9.64963	7.43338	6.88181	4.98189	10.2588	10.3105	7.2217	9.60935	7.08066	11.062	7.40345	1.98962	8.28195	9.8528	10.8497	11.6685	8.76029	11.3933	10.4852	7.0341	5.81379	10.6669	10.7267	9.00017	6.83686	5.94357	7.89922
GSM519422	8	0	cluster 2	8.15318	6.50214	8.47358	4.87877	9.55027	4.02455	8.91176	2.56237	5.78449	6.92515	8.69126	6.81481	8.73371	10.1942	8.00858	11.926	11.855	7.88198	9.43523	10.1093	7.69074	7.61857	3.77743	9.08743	9.72194	7.73207	9.50026	6.52238	8.21333	7.88709	4.41358	8.2073	10.0489	10.6887	11.0996	9.55479	10.7483	9.91754	6.82808	7.24954	8.42403	10.9902	9.22742	5.89616	5.81678	7.27214
GSM519423	8	0	cluster 2	8.99497	7.6886	8.95289	5.06636	9.74823	4.1743	7.29377	5.22336	4.79641	5.28567	8.87233	8.54259	9.38013	9.8955	6.74731	10.5678	11.0668	7.87947	8.57469	9.48072	6.44658	8.1013	4.31422	9.34336	9.27763	5.8761	11.1675	6.56448	11.2809	6.6964	3.57935	8.55023	10.1063	9.90899	12.2207	8.63566	9.89729	10.3376	7.61071	7.62609	9.45527	10.1468	9.17515	6.45523	3.59504	7.7763
GSM519424	8.4	0	cluster 1	8.6489	7.48502	9.50848	4.21337	9.31504	5.04965	8.79843	2.98128	2.88266	9.37147	9.41856	6.04271	9.01633	10.1451	6.37868	11.3441	11.133	7.07064	9.58609	10.4227	7.07273	7.86555	3.87437	7.00508	9.71421	7.20901	9.51856	6.37631	11.8928	8.8596	2.67294	9.25075	10.1117	10.2137	12.3961	9.44194	11.0027	10.1566	7.60799	6.5435	9.89577	11.0519	9.11496	6.98782	7.06159	7.57101
GSM519425	3.5	1	cluster 2	9.54302	7.70531	8.65973	12.6465	9.47698	5.99522	6.59711	2.95523	5.8743	5.12096	9.10906	7.00817	8.55627	11.0128	6.34464	11.8241	11.0588	8.06419	8.83582	10.7835	6.65877	8.7687	3.48368	7.81604	9.48715	6.28161	7.78578	6.75549	10.1944	4.4085	4.18908	7.75173	9.49758	9.79219	10.6318	8.7168	10.8549	10.1621	6.63789	7.35978	9.88844	10.5575	9.9061	6.08068	6.12939	7.48961
GSM519426	8.1	0	cluster 1	9.56653	7.80873	8.83113	5.04996	10.17	5.85991	8.09623	2.70177	1.40387	9.92253	8.49302	6.19012	8.84702	10.2298	7.0698	10.8896	11.1134	6.98313	8.87354	8.98557	6.71406	7.21375	2.8861	5.42128	9.29725	6.74896	8.29124	6.57798	11.7196	5.90288	1.7352	9.52154	9.60524	9.62893	9.63811	7.70052	11.2594	10.9289	8.76484	6.88262	8.1197	10.203	9.18041	5.7169	4.83422	7.24039
GSM519427	8.5	0	cluster 1	8.61129	7.12086	9.30758	4.32631	9.49321	5.59252	8.10359	2.23134	4.9278	7.65453	7.89948	6.48586	8.36955	9.83497	6.88902	11.3501	10.5936	6.64006	8.73909	9.96441	6.99724	7.46216	3.55636	6.45916	9.28422	6.59112	9.26872	6.31067	11.6175	5.66056	3.2528	8.77579	9.9534	10.1779	10.0509	7.29386	11.2314	10.7455	6.58319	6.29599	8.47239	9.01418	8.78502	5.50824	6.1714	7.13253
GSM519428	8.1	0	cluster 1	7.38902	7.09435	8.0574	4.2427	9.02796	6.09538	8.08867	2.76691	6.30172	4.56258	8.81653	7.82148	8.76379	9.99232	6.66022	12.046	11.2074	7.60804	9.18812	10.6877	6.90246	7.29301	3.0068	5.32096	9.19537	5.75142	8.67443	7.22014	10.4401	6.78801	1.44537	8.02027	9.88681	9.96138	10.231	8.76874	11.0696	9.86112	7.81084	7.37124	8.83081	10.264	9.26172	5.3067	6.27821	7.52354
GSM519429	6.4	0	cluster 1	9.49958	7.41423	9.16121	4.62487	9.93865	5.79295	7.77009	3.01379	2.32816	8.60869	8.18477	7.23735	8.47676	10.2565	7.3084	9.70796	11.3444	6.91003	9.15217	9.0276	6.5845	7.63564	3.88196	5.82166	10.0773	6.01465	8.48063	6.66913	9.76571	6.21471	3.94113	9.22657	9.67594	10.1201	10.4553	7.55263	11.0966	10.7578	8.32518	7.09919	8.27291	9.42417	8.62141	5.36831	7.73578	5.75976
GSM519430	1.5	0	cluster 1	7.29946	7.16779	9.21807	4.8575	10.3696	6.38382	8.49249	3.11161	4.27455	9.40478	8.27519	6.42679	9.97051	9.98103	7.01489	11.9577	10.577	6.5141	8.29758	10.545	7.33916	7.77447	3.77346	10.8528	10.4214	6.75274	8.64079	6.61552	10.4388	6.51535	3.39468	8.89176	10.2729	9.54378	10.806	7.88741	11.0041	10.5652	4.1958	6.61829	9.12505	10.0151	8.8306	4.44513	6.23362	6.97943
GSM519431	6.8	1	cluster 1	8.82631	6.93824	8.85468	4.90639	9.32583	5.5663	8.35818	2.79986	4.9278	10.4944	8.72392	6.66523	8.03957	9.54018	7.48783	10.4098	10.7013	6.51868	9.38613	9.70251	6.51644	7.28021	5.37675	8.288	10.6559	6.80527	9.09533	6.68901	10.0535	6.65453	2.52285	8.91017	9.80517	10.4555	10.8104	7.27051	11.2855	10.7326	6.87056	7.42434	9.41479	10.1707	8.64888	5.22349	6.23464	6.75013
GSM519432	6.7	0	cluster 1	8.96465	6.29405	9.28753	4.7331	10.2653	6.6187	7.79697	3.20759	3.6828	8.07999	9.43979	6.53094	8.34138	10.0518	7.17322	11.0751	9.96452	7.20177	8.99988	10.1111	7.23441	6.63297	3.19454	6.2968	9.44263	5.97567	8.68761	6.22129	10.3516	5.74397	3.57324	8.56428	9.59429	9.55296	10.9951	6.69021	10.3913	11.2307	8.26952	7.38846	8.79052	9.76047	8.78703	5.24249	6.13082	8.32341
GSM519433	6.5	0	cluster 1	6.75082	7.51946	8.43369	5.51033	9.86659	5.79019	7.36114	2.25061	4.14801	8.33089	9.32223	6.30168	8.9069	10.0532	6.3351	9.87108	11.8076	6.07775	10.0186	10.3802	6.91767	7.84329	4.18925	6.77877	10.9571	6.80761	8.63952	6.50336	11.299	6.16989	4.0907	9.58683	9.64993	10.8186	11.2874	8.36742	10.4992	9.44275	6.84231	7.14152	8.78824	9.96738	8.52757	6.50373	6.70085	7.91564
GSM519434	4	1	cluster 1	8.61064	7.24955	9.24952	7.53942	9.10099	6.17352	8.08579	3.70733	3.58492	6.04129	9.346	6.06157	9.61473	8.7934	7.23588	11.1537	10.684	7.42748	8.44465	9.76776	7.63343	7.80845	4.38386	7.47198	9.55469	6.98706	9.04429	6.38072	11.3248	7.56777	5.03301	9.42861	10.3046	9.35599	10.3749	7.78877	11.4542	9.97608	8.49038	6.82946	8.39343	10.2941	8.89659	6.41567	8.04058	6.47917
GSM519435	5.8	0	cluster 1	8.53476	7.18201	8.19666	4.34259	9.91644	3.52074	7.85832	2.5387	6.2598	8.29098	8.67914	6.22824	7.8111	10.7943	6.74558	11.2292	10.4355	6.41664	7.51225	10.0563	7.32009	6.88876	3.96044	5.14351	9.25891	6.28274	9.61842	6.28437	10.4461	5.38301	2.25329	9.11845	10.2456	9.80038	9.82789	7.16846	11.8683	9.42495	8.06617	6.96471	8.29657	9.07814	9.21994	6.47657	5.84973	8.22547
GSM519436	5	0	cluster 1	9.27684	8.03222	8.34309	4.55178	8.94934	1.78929	8.26927	3.45052	2.11238	8.81199	8.75358	5.28204	9.1871	9.79675	7.3623	10.75	11.2124	7.11244	10.0148	10.7205	6.70455	7.66789	3.39147	8.521	10.4462	7.1671	9.12461	7.81764	11.0516	4.76802	3.43702	9.3251	9.86965	11.3159	10.043	7.69515	11.3673	10.8816	7.40557	5.36476	8.88553	9.81167	9.694	5.19482	8.25676	7.42256
GSM519437	5.3	0	cluster 1	8.71076	8.00795	9.20362	4.34579	9.8896	4.27882	8.46748	3.28847	2.24525	11.7381	8.02878	7.8968	8.91937	10.461	6.27148	11.2721	11.0078	5.99997	8.76886	10.0773	7.16592	6.65962	3.18055	6.51817	9.62872	6.59736	9.70994	6.83825	10.4635	8.56573	3.72417	9.19708	9.6177	10.1115	11.1614	7.87659	10.5538	10.9903	8.07883	7.52634	8.02595	9.36552	7.42894	3.95833	5.36028	7.72417
GSM519438	4.9	0	cluster 1	9.45043	8.76179	8.53665	3.97162	9.99358	4.82477	7.40949	2.35398	3.18056	5.71551	8.58996	5.23156	11.3055	10.0477	5.46456	10.3505	12.7221	6.10905	8.51475	10.8301	7.62518	9.03098	3.28835	6.30341	11.7065	6.92932	8.68206	8.12645	10.671	7.05486	3.64714	8.3069	11.7642	11.3065	12.533	7.95668	10.5211	9.73243	7.63968	7.18164	8.60418	10.0032	8.9783	6.15579	6.61439	5.33578
GSM519439	4.7	0	cluster 1	8.15218	8.45682	10.0827	10.7581	8.96573	6.10598	7.63416	4.07776	4.03413	9.98076	9.45931	7.40697	8.49773	10.0894	7.22487	10.5068	11.8233	5.76085	9.8392	9.58167	6.28224	7.882	4.259	7.9154	11.5215	6.13098	9.51834	8.34979	10.7339	6.15117	3.80286	8.28292	9.54756	10.1371	12.0356	8.24064	11.146	11.4332	6.32346	7.0412	8.80083	10.7066	9.07535	6.84509	7.56802	6.83505
GSM519440	4.1	0	cluster 1	9.26586	8.45931	8.52995	3.71321	9.78134	4.64776	7.87973	2.71037	2.16859	4.56255	8.17102	5.91129	10.6915	9.86649	5.90179	10.0498	12.1587	6.8428	8.74333	10.4754	6.20366	8.30931	4.79658	6.89234	11.5631	6.02239	9.54158	7.84927	10.5324	7.96966	2.86452	8.82797	10.016	10.7861	11.4787	8.40775	11.0061	9.72559	6.77113	5.64884	8.88525	9.84473	8.90649	4.69339	4.69096	7.25722
GSM519441	3.8	0	cluster 1	6.23955	7.70651	9.16559	5.14487	9.04952	1.67675	7.77917	3.99744	3.92932	5.428	9.42092	5.77807	8.38606	10.0629	6.06838	11.024	10.917	6.2263	8.56449	9.76101	7.33224	7.67526	4.6428	7.01896	10.1793	7.11751	8.90732	5.87945	11.4376	5.94969	4.17144	8.58743	9.56046	9.59592	10.5774	7.71413	10.6018	10.1521	6.79368	6.13696	9.28553	9.76242	8.63703	5.11204	6.80443	6.96233
GSM519442	3.8	0	cluster 1	9.18219	7.95332	8.92708	10.4263	10.8882	3.20885	7.75684	3.88016	5.20303	7.81233	8.54922	6.1728	8.17523	10.2197	6.65537	10.6045	11.6158	6.05344	8.92968	10.4878	6.80828	7.95702	3.30911	6.04409	10.8414	7.31438	9.05434	7.95244	12.149	7.24604	2.3662	8.49661	9.86961	10.0901	11.754	7.48083	10.8544	10.3731	7.44822	7.01381	7.92776	10.2366	9.33589	5.87385	5.01657	6.65899
GSM519443	8.1	0	cluster 1	7.91436	8.14879	9.19326	3.82134	9.77999	5.09781	8.21252	2.61458	4.08898	4.77154	9.37123	5.81559	9.99553	9.26647	5.77463	10.6448	11.959	5.93165	8.9919	11.0754	7.88178	8.26483	3.99364	7.54348	11.0572	7.32497	8.89698	7.32371	11.0605	6.98063	2.19656	8.93903	11.2569	10.783	11.4299	8.53	11.1051	9.82544	7.87199	7.29511	8.74999	10.1942	8.67304	4.48001	6.30379	6.32219
[truncated: 125 more columns]
